# Supplementary material for: Use of driving-impairing medicines by a Spanish population: a population-based registry study
Source: PubMed Central journal article supplement — BMJ Open. 2017 Nov 22;7(11):e017618. doi: 10.1136/bmjopen-2017-017618 (PMC5719315; doi:10.1136/bmjopen-2017-017618), 2017-11-22
Supplement: bmjopen-2017-017618.draft_revisions.pdf [file bmjopen-2017-017618.draft_revisions.pdf]

# BMJ Open

BMJ Open is committed to open peer review. As part of this commitment we make the peer review history of every article we publish publicly available.

When an article is published we post the peer reviewers' comments and the authors' responses online. We also post the versions of the paper that were used during peer review. These are the versions that the peer review comments apply to.

The versions of the paper that follow are the versions that were submitted during the peer review process. They are not the versions of record or the final published versions. They should not be cited or distributed as the published version of this manuscript.

BMJ Open is an open access journal and the full, final, typeset and author-corrected version of record of the manuscript is available on our site with no access controls, subscription charges or pay-per-view fees (<http://bmjopen.bmj.com>).

If you have any questions on BMJ Open's open peer review process please email [editorial.bmjopen@bmj.com](mailto:editorial.bmjopen@bmj.com)

# BMJ Open

## The use of driving-impairing medicines by the population.

|                                 |                                                                                                                                                                                                                                                                                                                                                                                                                          |
|---------------------------------|--------------------------------------------------------------------------------------------------------------------------------------------------------------------------------------------------------------------------------------------------------------------------------------------------------------------------------------------------------------------------------------------------------------------------|
| Journal:                        | <i>BMJ Open</i>                                                                                                                                                                                                                                                                                                                                                                                                          |
| Manuscript ID                   | bmjopen-2017-017618                                                                                                                                                                                                                                                                                                                                                                                                      |
| Article Type:                   | Research                                                                                                                                                                                                                                                                                                                                                                                                                 |
| Date Submitted by the Author:   | 03-May-2017                                                                                                                                                                                                                                                                                                                                                                                                              |
| Complete List of Authors:       | Gutierrez-Abejón, Eduardo; Gerencia Regional de Salud de Castilla y León, Technical Direction of Pharmaceutical Assistance<br>Herrera-Gómez, Francisco; Universidad de Valladolid, Pharmacology and Therapeutics<br>Criado-Espejel, Paloma; Gerencia Regional de Salud de Castilla y León, Technical Direction of Pharmaceutical Assistance<br>Alvarez, F. Javier; University of Valladolid, Pharmacology & Therapeutics |
| <b>Primary Subject Heading</b>: | Global health                                                                                                                                                                                                                                                                                                                                                                                                            |
| Secondary Subject Heading:      | Public health                                                                                                                                                                                                                                                                                                                                                                                                            |
| Keywords:                       | drug prescription, drug utilization, risk assessment, accident, traffic, automobile driving, driving-impairing medicines                                                                                                                                                                                                                                                                                                 |
|                                 |                                                                                                                                                                                                                                                                                                                                                                                                                          |

SCHOLARONE™  
Manuscripts

1  
2  
3 **The use of driving-impairing medicines by the population.**  
4  
5  
6

7 Eduardo Gutierrez-Abejón<sup>1</sup>, Francisco Herrera-Gómez<sup>2,3</sup>, Paloma Criado-Espejel<sup>1</sup> and F. Javier  
8 Álvarez<sup>2</sup>  
9

10  
11  
12  
13  
14  
15 <sup>1</sup>Technical Direction of Pharmaceutical Assistance, Gerencia Regional de Salud de Castilla y  
16 León, Valladolid, Spain.  
17

18  
19 <sup>2</sup>Pharmacology, Faculty of Medicine, University of Valladolid, Valladolid, Spain.  
20

21  
22 <sup>3</sup>Department of Nephrology, Complejo Asistencial de Zamora, Zamora, Spain.  
23  
24  
25

26  
27 Correspondence: Professor F. Javier Álvarez, Pharmacology, Faculty of Medicine, University of  
28 Valladolid, Ethics Review Board, Hospital Clínico Universitario de Valladolid, Valladolid,  
29 Spain. Tel: +34 983 423077; Fax: +34 983 423022; E-mail: [alvarez@med.uva.es](mailto:alvarez@med.uva.es)  
30  
31  
32  
33  
34  
35

36 *Running head:* Medicines and driving.  
37  
38  
39

40 *Keywords:* Accidents, Traffic. Automobile Driving. Drug Prescriptions. Drug Utilization. Risk  
41 Assessment. Driving-impairing medicines.  
42  
43  
44  
45

46  
47 *Word count (excluding the title page, abstract, references, tables, and figures):* 2624  
48  
49  
50

51  
52 *Number of tables:* 04  
53  
54

55 *Number of figures:* 02  
56  
57  
58  
59  
60

## ABSTRACT

### OBJECTIVE

To assess the use of driving-impairing medicines (DIM) by the general population, with special reference to length of use and concomitant use.

### DESIGN

Open cohort study.

### SETTING

Year-2015 granted medicines consumption data recorded in the Castile & León medicines dispensation registry were consulted.

### PARTICIPANTS

Medicines and DIM consumers from a Spanish population (Castile & León: 2.4 million inhabitants).

### EXPOSURES

Medicines and DIM consumption. Patterns of use by age and gender, based on the length of use (acute: 1-7 days, sub-chronic: 8-29 days, and chronic use:  $\geq 30$  days), were of interest. Estimations regarding the distribution of licensed drivers by age and gender were made in order to know the patterns of use of DIM.

RESULTS: DIM were consumed by 34.4% (95%CI 34.3-34.5) of the general population in 2015, more commonly with regularity (chronic use: 22.5% versus acute use: 5.3%), and more frequently by the elderly. On average, 2.3 DIM *per* person were dispensed, particularly to chronic users (2.8 DIM *per* person). Age and gender distribution differences were observed between the Castile & León medicines dispensation registry data and the drivers' license census data. Of all

1  
2  
3 DIM dispensed, 83.8% were ATC group N medicines, which were prescribed to 29.2% of the  
4  
5  
6 population.

7  
8 CONCLUSIONS: The use of DIM was frequent in the general population and among drivers in  
9  
10 our region. Chronic use was common, but acute and sub-acute use should also be taken into  
11  
12 account. The fact that ATC group N medicines were the most consumed highlights the need to  
13  
14 improve dispensation tools.  
15  
16  
17  
18  
19  
20  
21  
22  
23  
24  
25  
26  
27  
28  
29  
30  
31  
32  
33  
34  
35  
36  
37  
38  
39  
40  
41  
42  
43  
44  
45  
46  
47  
48  
49  
50  
51  
52  
53  
54  
55  
56  
57  
58  
59  
60

## STRENGTHS AND LIMITATIONS OF THE STUDY

- This study explores the consumption of all driving-impairing medicines and patterns of use by age and gender corresponding to a European population in a comprehensive way.
- The Anatomical Therapeutic Chemical code (ATC) was used for improve transparency and reproducibility of our findings.
- The information covers all dispensed medicines by the public health system in Spain, but not hospital dispensed medications, nor over-the-counter medicines, some of which may be driving-impairing medicines.

## BACKGROUND

Driving a motor vehicle is a multifaceted task and requires appropriate cognitive and psychomotor skills (e.g. alertness, concentration, reaction time, visual acuity).<sup>1-2</sup> Medicines can adversely affect these driving-related skills and, consequently, be a hazard to traffic safety.<sup>3-4</sup> There is increasing awareness that the implementation of appropriate measures to limit the consumption of alcohol and other substances (“illicit” drugs and medicines) while driving may impact on road accident occurrence.<sup>5</sup> Nevertheless, it is as yet unknown how frequent the consumption of driving-impairing medicines (DIM) in the general population is, or how frequently several of these drugs are consumed concomitantly.<sup>6</sup>

On the one hand, most developed countries perform toxicological analyses on road accident casualties and fatalities, and the presence of illicit drugs and medicines (either used legally or illegally) are detected.<sup>7,8</sup> On-road tests (at random or on target populations) are used ever more frequently worldwide: the on-site screening devices detect some groups of illicit drugs and some medicines in saliva (oral fluid), confirmation analyses being performed later.<sup>7,8</sup> In other countries, blood analyses<sup>9</sup> are carried out rather than screening on saliva. The information from these sources (data on casualties/fatalities and on-road test data) gives only a partial vision of the problem regarding medicines and driving.<sup>10</sup>

On the other hand, medicine regulatory agencies do attempt to provide appropriate information to the public concerning the problem: in the European Union, the summary of product characteristics and the package leaflets contain information on medicines that “affect the ability to drive and to use machines”.<sup>11,12</sup> Furthermore, there have been some attempts to categorize the

1  
2  
3 effects of medicines on driving<sup>13</sup> and some countries, such as France<sup>14</sup> and Spain,<sup>15</sup> have  
4  
5 introduced specific mandatory pictograms; or ancillary warning labels, as in the Netherlands<sup>16</sup>  
6  
7  
8 and Australia.<sup>17</sup>  
9

10  
11  
12 The Spanish Law of 2007 (Royal Decree 1345/2007)<sup>15</sup> establishes that newly authorized  
13  
14 medicines which may negatively affect fitness to drive or to handle dangerous machinery should  
15  
16 include a warning symbol (pictogram) on the outside of the packaging. Since 2011, all medicines  
17  
18 that can possibly affect fitness to drive and are commercially available in Spain have this  
19  
20 pictogram on the packaging.<sup>18</sup> As of January 2016, a total of 2013 medicinal drugs permitted in  
21  
22 Spain had been reviewed, of which 402 (20%) include the pictogram on medicines and driving on  
23  
24  
25  
26 the packaging.<sup>19</sup>  
27  
28

29  
30  
31 We have considered these medicines with the pictogram “medicines and driving” on the  
32  
33 packaging in Spain as driving impairing medicines or, to be more exact, potentially impairing  
34  
35 medicines on driving. In 2016, a national consensus on Medicines and Driving was reached in  
36  
37 Spain: to know to what extent the population taking DIM is a priority and to decipher patterns of  
38  
39 use for these drugs.<sup>20</sup> This does not apply only to motor vehicle drivers and professional drivers,  
40  
41 but also the population at large, as well as all road users, including pedestrians and the ever more  
42  
43 common cyclists. Thus, the presence of illicit drugs and medicines is also frequently found in  
44  
45  
46  
47  
48 pedestrians involved in fatal road accidents.<sup>21</sup>  
49  
50

51  
52  
53 In our opinion, medicine-screening on the road should not be viewed as punishment of patients,  
54  
55 but rather a tool to better inform patients, as well as to prescribe and dispense better. The  
56  
57 detection of some medicines in on-road tests has been the object of awareness-raising in public  
58  
59  
60



1  
2  
3 and health professionals, as well as the subject of campaigns to inform the general public, as in  
4  
5 the UK.<sup>22</sup> In some countries, for instance the UK,<sup>23</sup> Spain<sup>24</sup> or Norway,<sup>25</sup> on-road positive cases  
6  
7 to medicines are not fined if they were used according to a physician's prescription. Again, it is  
8  
9 necessary that the consumption of DIM and their patterns of use should be known in detail, given  
10  
11 that there is a shortage of information about this.  
12  
13

14  
15  
16  
17 Consequently, the aim of our study was to explore the use of DIM by the general population. The  
18  
19 consumption of medicines with the pictogram "medicines and driving" was assessed on the basis  
20  
21 of our dispensation registry, focusing on concomitant use of these drugs and on their length of  
22  
23 use. In addition, estimations were compared with the drivers' license census in order to know the  
24  
25 patterns of use among drivers.  
26  
27  
28  
29  
30

## 31 **METHODS**

### 32 **Study population: CONCYLIA database**

33  
34  
35  
36  
37  
38  
39  
40  
41 Access was provided to the CONCYLIA database to assess the dispensation of granted medicines  
42  
43 by the Spanish public health system in Castile & León during 2015.<sup>26</sup>  
44  
45  
46  
47

48  
49 Basically, the CONCYLIA database includes information on all medicine dispensations by the  
50  
51 public health system, except those dispensed at hospitals, medical prescriptions dispensed  
52  
53 through private medicine clinics, and those which do not require a medical prescription ('over the  
54  
55 counter' medication). We assessed medicine dispensation per person using the patient  
56  
57 identification number: for each person, any dispensation during 2015 was identified (medicinal  
58  
59  
60

1  
2  
3 product, number of doses, data of dispensation, etc). For data protection, the final database  
4 provided by the health system was anonymized, and no personal identification was included.  
5  
6  
7  
8  
9

## 10 **Target population**

11  
12  
13  
14  
15 The population distribution covered by the public health system and the population distribution  
16 according to the population census match well: Castile & León had a population of 2,428,901 in  
17 December 2015,<sup>27</sup> 2,376,717 being covered by the public health system at that time (97.85% of  
18 the total).<sup>28</sup>  
19  
20  
21  
22  
23  
24  
25  
26

27 As not all persons had a motor vehicle license, calculations were made regarding the distribution  
28 of licensed drivers by age and gender, using the Castile & León drivers' license census up to  
29 December 2015.<sup>29</sup> This was done as no information on medicine use by drivers is recorded in the  
30 CONCYLIA database. Therefore, results are presented regarding the general population based on  
31 the drivers' license census data (Table 1).  
32  
33  
34  
35  
36  
37  
38  
39  
40

## 41 **Driving-impairing medicines**

42  
43  
44  
45 As mentioned above, granted medicines in Spain with the pictogram "medicines and driving"  
46 were considered as DIM.  
47  
48  
49  
50  
51  
52

53 In the CONCYLIA database, each one of the medicines, based on the Anatomical Therapeutic  
54 Chemical code (ATC), is identified as having such a pictogram or not; this information was taken  
55 from the Spanish Medicine Agency, from information updated to February 1<sup>st</sup> 2016.<sup>19</sup>  
56  
57  
58  
59  
60

### Variables and ethical issues

The following variables describing the consumption of medicines and DIM in Castile & León in the year 2015 were considered:

- i) Yearly frequency of all medicine use;
- ii) Yearly frequency of DIM use: acute (1-7 days), sub-acute (8-29 days) and chronic or regular use ( $\geq 30$  days);
- iii) Yearly frequency of daily use of at least one DIM;
- iv) Number and means of different DIM taken within 2015.

All analyses were made considering age and gender distribution.

Ethic Review Board approval was obtained (Reference number PI 16-387, approved on March 17<sup>th</sup>, 2016)

### Statistical analysis

All values are given as percentages (frequencies) with a 95% confidence interval (95%CI) or as means  $\pm$  standard deviations (SD). For comparisons, the Student's *t* test was used for continuous variables and Pearson's chi-square test for categorical variables. Two-tailed  $P < 0.05$  were considered significant. All statistical analyses were performed using the Statistical Package for Social Sciences (SPSS version 23.0.; SPSS Inc, Chicago, IL).

## RESULTS

### Descriptive mapping

A total of 48,858,588 medicines were dispensed in 2015. Nearly 3 out of 4 people took a medicinal product in 2015, more females than males (78.4% versus 68.8%,  $p < 0.05$ ), and this increased in line with age (Table 1).

One out of three (34.4%, 95%CI 34.3-34.5) consumed a DIM in 2015, again more frequent among females (40.3% versus 28.3%,  $p < 0.05$ ), and this also increased in line with age. A majority needed to use these medicines on a regular basis (chronic use: 22.5%), while the use for a few days or weeks accounted for, respectively, 5.3% and 6.6%, with similar patterns of use by age and gender (Table 1).

However, if the distribution is performed with respect to the drivers' license census, 25.4% (95%CI 25.3-25.43) of people took a DIM in 2015, more males than females (26.5% versus 23.7%,  $p < 0.05$ ) and mostly regularly (chronic use: 15.3%, 95%CI 15.2-15.32; sub-acute use: 5.96%, 95%CI 5.92-5.99; acute use: 4.14%, 95%CI 4.11-4.18).

Figure 1 and Table 1 show those who used DIM in 2015, their distribution by age and gender, and regarding the drivers' license census. Age trends differ between the sexes: consumption dropped dramatically among female drivers from 60 years of age as compared to male drivers using less DIM over 75 years of age.

1  
2  
3 At least one DIM was consumed daily by 5.6% (95%CI 5.52-5.58) of people, and by 3.7%  
4  
5  
6 (95%CI 3.67-3.73) of licensed drivers.  
7  
8  
9

10 On average (Table 2), each person taking DIM took 2.3 medicines (2.1 according to the drivers'  
11 license census data). Acute and sub-acute consumers (97.5% and 69.1%, respectively) took just  
12 one DIM, while chronic consumers (71.5%) took 2 DIM or more (mean number of DIM use:  
13  
14 2.8). Trends between sexes were similar when the drivers' license census data was analyzed  
15  
16  
17 (Table 2).  
18  
19  
20  
21  
22  
23

### 24 **Types of DIM consumed**

25  
26  
27  
28

29 Of the 10,862,138 DIM dispensed, 9,102,052 (83.8%) belong to the ATC classification group N  
30 (Nervous System), 1,176,864 (10.8%) to the group A (Alimentary Tract and Metabolism) and  
31  
32 160,631 (1.5%) to the group R (Respiratory System). ATC group N medicines were prescribed to  
33  
34 29.2% of the population (21.3% regarding the drivers' license census), group A medicines to  
35  
36 5.4% (4% for drivers), and group R medicines to 4% (2.3% for drivers). (Table 3)  
37  
38  
39  
40  
41  
42

43 Interestingly, ATC groups N, A and R were more frequently prescribed to females than males, all  
44 people considered. When considering licensed drivers, the trends showed no differences. Table 4  
45  
46 shows those DIM used for a few days or weeks and chronically.  
47  
48  
49  
50  
51  
52  
53  
54  
55  
56  
57  
58  
59  
60

## DISCUSSION

A detailed description of the consumption of DIM in the general population from Castile & León in 2015 is provided. DIM were consumed by 34.4% (95%CI 34.3–34.5) of the general population, and more commonly on a regular basis (22.5%). However, the use for a few days (5.3%) or a few weeks (6.6%) should not be neglected. The consumption of DIM increased in line with age. Acute and sub-acute consumers took at least one DIM, and chronic users took nearly three. Of all DIM dispensed, 83.8% belong to the ATC classification group N (Nervous System), which were dispensed to 29.2% of the population. Similar trends were found regarding the distribution of licensed drivers by gender, but not by age.

The DRUID [1] project provides information on the prevalence of use in Europe of some types of medicines randomly detected in drivers. Of all positive matches (1.36%), benzodiazepines (0.9%), Z-drugs (0.12%), and opioids (0.35%) were confirmed. Furthermore, there is information for other developed countries on the consumption of alcohol, illicit drugs and certain medicines by people injured/killed in road traffic accidents.<sup>7-10</sup> Although progress has been made in understanding this social and medical problem of driving under the effects of medicines, available data allows just a partial vision, as only a few groups of DIM (mainly psychotropic drugs) have been analyzed in blood and oral fluid specimens from drivers. There has also been an attempt to estimate DIM consumption based on dispensed medicines,<sup>6</sup> or using driver consumption surveys.<sup>30</sup> Our study provides a detailed overview of all DIM used by the general population and, to our knowledge, this is the first work in this matter.

1  
2  
3 One out of 3 used a DIM in 2015. Importantly, acute users represented a sizeable proportion of  
4  
5 all drivers consuming DIM (5.3%). The effect of medications on driving is more relevant in the  
6  
7 first days of use.<sup>31,32</sup> Drivers consuming DIM for a few days might therefore be the most affected,  
8  
9 particularly those taking more than one medicine, and this must be taken into account. In  
10  
11 addition, multiple daily dosing is an important factor to consider,<sup>6,33</sup> especially for drivers over 50  
12  
13 years old.<sup>33</sup>  
14  
15  
16  
17  
18  
19

20 More than 2 DIM were dispensed (drivers and non-drivers), particularly to chronic users who  
21  
22 took nearly three. In addition, approximately 6% of people consumed at least one DIM daily  
23  
24 during the year 2015. Impairment on driving seems to diminish with chronic/stable DIM use,<sup>32</sup>  
25  
26 probably due to tolerance.<sup>34</sup> However, clinical explorations of fitness to drive under the effects of  
27  
28 DIM should be performed.<sup>34</sup> Tolerance is a problem that has not been completely assessed and  
29  
30 nor has what happens when more than one medicine is consumed. A higher prevalence of regular  
31  
32 and daily use of DIM are not uncommon in Spain and other developed countries. So our results  
33  
34 provide an epidemiological view of the current impact of medicine use patterns which highlight  
35  
36 the importance of daily regimens, as well as for elderly acute users.  
37  
38  
39  
40  
41  
42

43 Our results show that some types of medicines are more prescribed than others. ATC group N  
44  
45 medicines were prescribed with predilection, mostly to females. This is corroborated by the study  
46  
47 of Ravera *et al.*<sup>6</sup> The finding of frequent DIM use is not surprising, as 20% of granted medicines  
48  
49 (402 out of 2,013) in Spain are DIM (with the pictogram “medicines and driving” on the  
50  
51 packaging). In addition, 83.8% of dispensed DIM in Castile & León were ATC group N  
52  
53 medicines (178 out of 402). In this context, mandatory pictograms and warning labels contribute  
54  
55 to awareness of DIM consumption risks for consumer engagement,<sup>35,36</sup> the noticeability of these  
56  
57  
58  
59  
60

1  
2  
3 medication warnings being a challenging task.<sup>37</sup> Furthermore, there are initiatives worldwide for  
4  
5 refining information on the risk categorization of drugs<sup>1,13,38,39</sup> that must be implemented in  
6  
7 dispensing support tools (software)<sup>40</sup> for a better prescription/dispensation of DIM.  
8  
9

10  
11  
12 Our study provides in detail which DIM are consumed and how. We thus answer the objectives  
13  
14 of the Spanish consensus on Medicines and Driving reached recently. Giving clearer information  
15  
16 about the influence of medicines on driving in order to sensitize health professionals and the  
17  
18 general population on the negative effects of DIM is a priority.<sup>20</sup> Our results stress the need to  
19  
20 improve the communication of DIM risks, in line with recent requirements. Nevertheless, DIM  
21  
22 risk communication is a complex clinical, methodological and epidemiological challenge, and the  
23  
24 “boosters” (warning label methods, dispensation software, information campaigns, etc.) should  
25  
26 be cautiously implemented in key steps, the main objective being to minimize road accidents.  
27  
28 Again, detailed knowledge of the use of DIM is a priority.  
29  
30  
31  
32  
33

34  
35  
36 This study has some limitations. The health system in Spain is public and free, and we used the  
37  
38 data from a medicine dispensation registry, which implies that the information covers all  
39  
40 dispensed medicines within such a system, but not hospital dispensed medications, nor over-the-  
41  
42 counter medicines, some of which may have the Spanish pictogram. Data is presented regarding  
43  
44 the general population, not only drivers. However, even pedestrians and cyclists could be  
45  
46 involved in road traffic accidents, DIM use being a possible cause. In the CONCYLIA database,  
47  
48 no information on medicine use by drivers is recorded, and calculations were made regarding the  
49  
50 distribution of licensed drivers. This should be taken into account, as the distribution of drivers in  
51  
52 other countries or regions could be different, especially because information is not available on  
53  
54 the extent to which drivers with a license drove vehicles.  
55  
56  
57  
58  
59  
60



## CONCLUSION

The use of driving-impairing medicines was frequent in the general population from Castile & León in 2015. Chronic use (30 days or more) was common, but acute use (1-7 days) and sub-acute use (8-29 days) must not be observed with indifference, because they might be the most relevant regarding the communication of DIM consumption risks. ATC group N medicines were the most prescribed and this fact stresses the need to ameliorate prescription and dispensation tools.

## Contributors

F.J.A. conceived the study design. E.G.-A. conducted the study. E.G.-A., F.H.-G., P.C.-E. and F.J.A. analyzed the data, contributed to the interpretation of the results, and wrote the manuscript. All authors reviewed and approved the final version of the manuscript.

## Funding

This work has been supported by the Dirección General de Tráfico (DGT) reference: SP IP2017-02120.

## Competing Interests

No competing interests.

1  
2  
3 **Data sharing statement**  
4  
5  
6  
7

8 No additional data are available  
9  
10  
11  
12  
13  
14  
15  
16  
17  
18  
19  
20  
21  
22  
23  
24  
25  
26  
27  
28  
29  
30  
31  
32  
33  
34  
35  
36  
37  
38  
39  
40  
41  
42  
43  
44  
45  
46  
47  
48  
49  
50  
51  
52  
53  
54  
55  
56  
57  
58  
59  
60

For peer review only

## REFERENCES

1. Schulze H, Schumacher M, Urmeew R, Auerbach K, Alvarez FJ, Bernhoft IM, de Gier JJ, Hagenzieker M, Houwing S, Knoche A, Pilgerstorfer M, Zlender B. Driving under the influence of drugs, alcohol and medicines in europe — findings from the DRUID project. Lisbon: EMCDDA; 2012. <http://www.emcdda.europa.eu/publications/thematic-papers/druid> (Accessed 9 Jan 2017)
2. Ramaekers JG. Drugs and Driving Research in Medicinal Drug Development. Trends Pharmacol Sci. 2017 Mar 7. pii: S0165-6147(17)30022-6.
3. Ravera S, van Rein N, de Gier JJ, de Jong-van den Berg LT. Road traffic accidents and psychotropic medication use in The Netherlands: a case-control study. Br J Clin Pharmacol 2011; 72: 505-13.
4. Orriols L, Delorme B, Gadegbeku B, Tricotel A, Contrand B, Laumon B, Salmi LR, Lagarde E; CESIR research group.. Prescription medicines and the risk of road traffic crashes: a French registry-based study. PLoS Med 2010; 16: e1000366.
5. WHO. Drug use and road safety: a policy brief. Geneva, Switzerland, World Health Organization, 2016. <http://www.who.int/iris/handle/10665/249533> (Accessed 9 Jan 2017)
6. Ravera S, Hummel SA, Stolk P, Heerdink RE, de Jong-van den Berg LT, de Gier JJ. The use of driving impairing medicines: a European survey. Eur J Clin Pharmacol 2009; 65: 1139-47.
7. Gómez-Talegón T, Fierro I, González-Luque JC, Colás M, López-Rivadulla M, Javier Álvarez F. Prevalence of psychoactive substances, alcohol, illicit drugs, and medicines, in Spanish drivers: a roadside study. Forensic Sci Int 2012; 223: 106-13.

- 1  
2  
3 8. Simonsen KW, Steentoft A, Hels T, Bernhoft IM, Rasmussen BS, Linnet K. Presence of  
4  
5 psychoactive substances in oral fluid from randomly selected drivers in Denmark.  
6  
7 Forensic Sci Int 2012; 221: 33-8.  
8  
9
- 10 9. Bezemer KD, Smink BE, van Maanen R, Verschraagen M, de Gier JJ. Prevalence of  
11  
12 medicinal drugs in suspected impaired drivers and a comparison with the use in the  
13  
14 general Dutch population. Forensic Sci Int 2014; 241: 203-11.  
15  
16
- 17 10. Rudisill TM, Zhao S, Abate MA, Coben JH, Zhu M. Trends in drug use among drivers  
18  
19 killed in U.S. traffic crashes, 1999-2010. Accid Anal Prev 2014; 70: 178-87.  
20  
21
- 22 11. Council Directive 83/570/EEC of 26 October 1983 amending Directives 65/65/EEC,  
23  
24 75/318/EEC and 75/319/EEC on the approximation of provisions laid down by law,  
25  
26 regulation or administrative action relating to proprietary medicinal products. OJ L 332,  
27  
28 28.11.1983, p. 1–10 (DA, DE, EL, EN, FR, IT, NL).  
29  
30  
31 <http://data.europa.eu/eli/dir/1983/570/oj> (Accessed 9 Jan 2017)  
32  
33
- 34 12. European Commission. Enterprise and Industry Directorate-General A guideline on  
35  
36 summary of product characteristics (SmPC) 2009. [online]. Available at  
37  
38 [http://ec.europa.eu/health/files/eudralex/vol-2/c/smpc\\_guideline\\_rev2\\_en.pdf](http://ec.europa.eu/health/files/eudralex/vol-2/c/smpc_guideline_rev2_en.pdf) and  
39  
40 [http://ec.europa.eu/health/documents/eudralex/vol-2/index\\_en.htm](http://ec.europa.eu/health/documents/eudralex/vol-2/index_en.htm) (Accessed 9 Jan 2017)  
41  
42
- 43 13. de Gier JJ, Alvarez FJ, Mercier-Guyon C, Verstraete AG. Prescribing and dispensing  
44  
45 guidelines for medicinal drugs affecting driving performance. In: Drugs, Driving and  
46  
47 Traffic Safety, eds Verster JC, Pandi-Perumal SR, Ramaekers JG, de Gier JJ. Basel:  
48  
49 Birkaeuser Verlag AG, 2009: 121-34.  
50  
51
- 52 14. Ministère de la Santé et des Solidarités. Direction Generale de la Santé. Arrêté du 18  
53  
54 Juillet 2005 pris pour l'application de l'article R.5121-139 du code de la santé publique et  
55  
56 relative à l'opposition d'un pictogramme sur le conditionnement extérieur de certain  
57  
58  
59  
60

- médicaments et produits Journal Officiel de la République Française. Août 2005  
(SAN/P0522726A) (Accessed 9 Jan 2017)
15. Real Decreto 1345/2007, de 11 de octubre, por el que se regula el procedimiento de autorización, registro y condiciones de dispensación de los medicamentos de uso humano fabricados industrialmente. pp. 45652–45698. BOE de 7 de Noviembre de 2007.  
[http://www.boe.es/diario\\_boe/txt.php?id=BOE-A-2007-19249](http://www.boe.es/diario_boe/txt.php?id=BOE-A-2007-19249) (Accessed 9 Jan 2017)
16. Patrício Monteiro S. Driving-impairing Medicines and Traffic Safety: Patient's Perspectives (PhD thesis). University of Groningen, 2014.
17. Jomaa I, Odisho M, Cheung JM, Wong K, Ellis JG, Smyth T, et al. Pharmacists' perceptions and communication of risk for alertness impairing medications. Res Social Adm Pharm. 2017 Jan 10. pii: S1551-7411(16)30377-1.
18. Agencia Española de Medicamentos y Productos Sanitarios. Medicamentos y Conduccion. <http://www.aemps.gob.es/industria/etiquetado/conduccion/home.htm>  
(Accessed July 2016)
19. Agencia Española de Medicamentos y Productos Sanitarios. Medicamentos y Conduccion: Listados de principios activos por grupos ATC\* e incorporación del pictograma de la conducción  
<http://www.aemps.gob.es/industria/etiquetado/conduccion/listadosPrincipios/home.htm>  
(Accessed July 2016)
20. Documento de consenso sobre medicamentos y conducción en España: información a la población general y papel de los profesionales sanitarios.  
[http://www.msssi.gob.es/profesionales/saludPublica/prevPromocion/docs/Medicamentos\\_conduccion\\_DocConsenso.pdf](http://www.msssi.gob.es/profesionales/saludPublica/prevPromocion/docs/Medicamentos_conduccion_DocConsenso.pdf) (Accessed May 2016)

- 1  
2  
3  
4  
5  
6  
7  
8  
9  
10  
11  
12  
13  
14  
15  
16  
17  
18  
19  
20  
21  
22  
23  
24  
25  
26  
27  
28  
29  
30  
31  
32  
33  
34  
35  
36  
37  
38  
39  
40  
41  
42  
43  
44  
45  
46  
47  
48  
49  
50  
51  
52  
53  
54  
55  
56  
57  
58  
59  
60
21. Instituto Nacional de Toxicología y Ciencias Forenses. Víctimas mortales en accidentes de tráfico: memoria 2016. Ministerio de Justicia.  
[https://administraciondejusticia.gob.es/paj/PA\\_WebApp\\_SGNTJ\\_NPAJ/descarga/Memoria%20Trafico%20INTCF202014.pdf?idFile=00359cf9-26d5-4d33-96ea-ec9703c78470](https://administraciondejusticia.gob.es/paj/PA_WebApp_SGNTJ_NPAJ/descarga/Memoria%20Trafico%20INTCF202014.pdf?idFile=00359cf9-26d5-4d33-96ea-ec9703c78470)  
(Accessed May 2016).
22. GOV:UK. Drugs and driving: the law. Collection Drug driving.  
<https://www.gov.uk/drug-driving-law> (Accessed 9 Jan 2017)  
<https://www.gov.uk/government/collections/drug-driving#table-of-drugs-and-limits>  
(Accessed 9 Jan 2017)
23. Department for Transport. Guidance for healthcare professionals on drug driving. London: Department for Transport; 2014.  
[https://www.gov.uk/government/uploads/system/uploads/attachment\\_data/file/325275/healthcare-profs-drug-driving.pdf](https://www.gov.uk/government/uploads/system/uploads/attachment_data/file/325275/healthcare-profs-drug-driving.pdf) (Accessed 9 Jan 2017)
24. Álvarez FJ, González-Luque JC, Seguí-Gómez M. Drugs, Substance Use Disorder and Driving: Intervention of Health Professionals in the Treatment of Addictions. *Adicciones* 2015; 27: 161-7.
25. Norwegian Ministry of Transport and Communications. Driving under the influence of non-alcohol drugs-legal limits implemented in Norway. Oslo: Norwegian Government Security and Service Organization; 2014.  
[https://www.regjeringen.no/globalassets/upload/sd/vedlegg/brosjyrer/sd\\_ruspavirket\\_kjoring\\_net.pdf](https://www.regjeringen.no/globalassets/upload/sd/vedlegg/brosjyrer/sd_ruspavirket_kjoring_net.pdf) (Accessed 9 Jan 2017)
26. CONCYLIA. Sistema de Información de Farmacia. Gerencia Regional de Salud de Castilla y León.

- 1  
2  
3 27. Instituto Nacional de Estadística. Cifras oficiales de población de los municipios  
4  
5 españoles: Revisión del Padrón Municipal.  
6  
7 [http://www.ine.es/dyngs/INEbase/es/operacion.htm?c=Estadistica\\_C&cid=125473617701](http://www.ine.es/dyngs/INEbase/es/operacion.htm?c=Estadistica_C&cid=125473617701)  
8  
9 [1&menu=resultados&secc=1254736195458&idp=1254734710990](http://www.ine.es/dyngs/INEbase/es/operacion.htm?c=Estadistica_C&cid=125473617701) (Accessed 15 Jun  
10  
11 2016)  
12  
13  
14  
15 28. Tarjeta Sanitaria de SACYL. Recursos y Gestión Poblacional. Gerencia Regional de  
16  
17 Salud. 2015.  
18  
19  
20 29. Ministerio del Interior. Dirección General de Tráfico. Estadísticas e Indicadores. Permisos  
21  
22 de conducción. <http://www.dgt.es/es/seguridad-vial/estadisticas-e-indicadores/permisos->  
23  
24 [conduccion/](http://www.dgt.es/es/seguridad-vial/estadisticas-e-indicadores/permisos-) (Accessed 15 Jun 2016).  
25  
26  
27 30. Del Río MC, Alvarez FJ. Medication and fitness to drive. *Pharmacoepidemiol Drug Saf*  
28  
29 2003; 12(5): 389-94.  
30  
31  
32 31. Barbone F, McMahon AD, Davey PG, Morris AD, Reid IC, McDevitt DG, MacDonald  
33  
34 TM. Association of road-traffic accidents with benzodiazepine use. *Lancet* 1998; 352:  
35  
36 1331-6.  
37  
38  
39 32. Wilhelmi BG, Cohen SP. A framework for "driving under the influence of drugs" policy  
40  
41 for the opioid using driver. *Pain Physician* 2012; 15: ES215-30.  
42  
43  
44 33. Monárrez-Espino J, Laflamme L, Elling B, Möller J. Number of medications and road  
45  
46 traffic crashes in senior Swedish drivers: a population-based matched case-control study.  
47  
48 *Inj Prev* 2014; 20(2): 81-7.  
49  
50  
51 34. Schumacher MB, Jongen S, Knoche A, Petzke F, Vuurman EF, Vollrath M, Ramaekers  
52  
53 JG. Effect of chronic opioid therapy on actual driving performance in non-cancer pain  
54  
55 patients. *Psychopharmacology (Berl)* 2017; 234: 989-99.  
56  
57  
58  
59  
60

- 1  
2  
3  
4  
5  
6  
7  
8  
9  
10  
11  
12  
13  
14  
15  
16  
17  
18  
19  
20  
21  
22  
23  
24  
25  
26  
27  
28  
29  
30  
31  
32  
33  
34  
35  
36  
37  
38  
39  
40  
41  
42  
43  
44  
45  
46  
47  
48  
49  
50  
51  
52  
53  
54  
55  
56  
57  
58  
59  
60
35. Monteiro SP, Huiskes R, Van Dijk L, Van Weert JC, De Gier JJ. How effective are pictograms in communicating risk about driving-impairing medicines? *Traffic Inj Prev* 2013; 143: 299-308.
36. Emich B, van Dijk L, Monteiro SP, de Gier JJ. A study comparing the effectiveness of three warning labels on the package of driving-impairing medicines. *Int J Clin Pharm* 2014; 366: 1152-9.
37. Smyth T, Sheehan M, Siskind V, Mercier-Guyon C, Mallaret M. Consumer perceptions of medication warnings about driving: a comparison of French and Australian labels. *Traffic Inj Prev* 2013; 14: 557-64.
38. DRUID, 2012. DRUID Driving Under the Influence of Drugs, Alcohol and Medicines. Final Report. [www.druid-project.eu/DRUID/EN/Dissemination/downloads\\_and\\_links/Final\\_Report.pdf?\\_blob=publicationFile](http://www.druid-project.eu/DRUID/EN/Dissemination/downloads_and_links/Final_Report.pdf?_blob=publicationFile) (Accessed 9 Jan 2017)
39. International Council on Alcohol, Drugs and Traffic Safety. Utrecht: ICADTS; 2001.
40. Legrand SA, Boets S, Meesmann U, Verstraete AG. Medicines and driving: evaluation of training and software support for patient counselling by pharmacists. *Int J Clin Pharm* 2012; 34: 633-43.
41. Emich B, van Dijk L, Monteiro SP, de Gier JJ. A study comparing the effectiveness of three warning labels on the package of driving-impairing medicines. *Int J Clin Pharm* 2014; 36: 1152-9.
42. Goyal RK, Rajan SS, Essien EJ, Sansgiry SS. Effectiveness of FDA's new over-the-counter acetaminophen warning label in improving consumer risk perception of liver damage. *J Clin Pharm Ther* 2012; 37: 681-5.



- 1  
2  
3 43. McCarthy DM, Davis TC, King JP, Mullen RJ, Bailey SC, Serper M, Jacobson KL,  
4  
5 Parker RM, Wolf MS. Take-Wait-Stop: a patient-centered strategy for writing PRN  
6  
7 medication instructions. *J Health Commun* 2013; 18 Suppl 1: 40-8.  
8  
9  
10 44. Houwing S, Hagenzieker M, Mathijssen RP, Legrand SA, Verstraete AG, Hels T,  
11  
12 Bernhoft IM, Simonsen KW, Lillsunde P, Favretto D, Ferrara SD, Caplinskiene M,  
13  
14 Movig KL, Brookhuis KA. Random and systematic errors in case-control studies  
15  
16 calculating the injury risk of driving under the influence of psychoactive substances.  
17  
18 *Accid Anal Prev* 2013; 52: 144-53.  
19  
20  
21 45. Houwing S, Legrand SA, Mathijssen R, Hagenzieker M, Verstraete AG, Brookhuis K.  
22  
23 Prevalence of psychoactive substances in dutch and belgian traffic. *J Stud Alcohol Drugs*  
24  
25 2012; 73(6): 951-60.  
26  
27  
28 46. Brubacher JR, Chan H, Pursell E, Tuyp BJ, Ting DK, Mehrnoush V. Minor Injury  
29  
30 Crashes: Prevalence of Driver-Related Risk Factors and Outcome. *J Emerg Med* 2017  
31  
32 Mar 7. pii: S0736-4679(17)30113-0.  
33  
34  
35 47. Rudisill TM, Zhao S, Abate MA, Coben JH, Zhu M. Trends in drug use among drivers  
36  
37 killed in U.S. traffic crashes, 1999-2010. *Accid Anal Prev* 2014; 70: 178-87.  
38  
39  
40 48. Orriols L, Luxcey A, Contrand B, Gadegbeku B, Delorme B, Tricotel A, Moore N, Salmi  
41  
42 LR, Lagarde E. Road traffic crash risk associated with benzodiazepine and z-hypnotic use  
43  
44 after implementation of a colour-graded pictogram: a responsibility study. *Br J Clin*  
45  
46 *Pharmacol* 2016; 82(6): 1625-1635.  
47  
48  
49  
50  
51  
52  
53  
54  
55  
56  
57  
58  
59  
60

Table 1. Data on consumption of medicines according to CONCYLIA database and drivers' license census

|                                | Population in Castile & León with health insurance card (December 2015) | Drivers' license census (December 2015) | All medicines % (95CI)     | Medicines with the pictogram "Medicines and Driving" % (95CI) |                         |                            | Drivers using medicines with the pictogram "Medicines and Driving" % (95CI) |
|--------------------------------|-------------------------------------------------------------------------|-----------------------------------------|----------------------------|---------------------------------------------------------------|-------------------------|----------------------------|-----------------------------------------------------------------------------|
|                                |                                                                         |                                         |                            | Acute                                                         | Sub-acute               | Chronic                    |                                                                             |
| <b>TOTAL</b>                   | <b>2 376 717</b>                                                        | <b>1 470 389</b>                        | <b>73.69 (73.63–73.75)</b> | <b>5.31 (5.28–5.34)</b>                                       | <b>6.64 (6.61–6.67)</b> | <b>22.46 (22.41–22.51)</b> | <b>25.36 (25.29–25.43)</b>                                                  |
| <b>Sex</b>                     |                                                                         |                                         |                            |                                                               |                         |                            |                                                                             |
| <b>Male</b>                    | 1 168 591                                                               | 887 357                                 | 68.78 (68.70–68.86)        | 5.06 (5.02–5.10)                                              | 5.58 (5.54–5.62)        | 17.69 (17.62–17.76)        | 26.46 (26.37–26.55)                                                         |
| <b>Female</b>                  | 1 208 126                                                               | 583 032                                 | 78.43 (78.36–78.50)        | 5.56 (5.52–5.60)                                              | 7.66 (7.61–7.71)        | 27.06 (26.98–27.14)        | 23.69 (23.58–23.8)                                                          |
| <b>Age range (Male/Female)</b> |                                                                         |                                         |                            |                                                               |                         |                            |                                                                             |
| <b>0-4</b>                     | 45 405 / 42 504                                                         | -                                       | 76.59 / 74.86              | 15.61 / 15.31                                                 | 2.81 / 2.37             | 0.52 / 0.43                | -                                                                           |
| <b>5-9</b>                     | 50 925 / 48 078                                                         | -                                       | 71.22 / 69.60              | 6.82 / 7.05                                                   | 1.57 / 1.34             | 2.73 / 1.50                | -                                                                           |
| <b>10-14</b>                   | 49 439 / 47 220                                                         | -                                       | 67.24 / 65.53              | 3.47 / 3.86                                                   | 1.48 / 1.49             | 6.92 / 3.12                | -                                                                           |
| <b>15-19</b>                   | 48 620 / 46 904                                                         | 9 282 / 5 586                           | 62.49 / 68.16              | 3.17 / 4.18                                                   | 2.88 / 4.71             | 7.06 / 5.33                | 2.50 / 1.69                                                                 |
| <b>20-24</b>                   | 54 724 / 53 382                                                         | 43 294 / 35 387                         | 53.00 / 67.78              | 3.48 / 4.77                                                   | 3.81 / 6.75             | 4.51 / 5.87                | 9.34 / 11.53                                                                |
| <b>25-29</b>                   | 62 787 / 61 247                                                         | 55 831 / 50 618                         | 47.83 / 65.06              | 3.51 / 5.06                                                   | 4.15 / 7.36             | 4.81 / 7.23                | 11.09 / 16.24                                                               |
| <b>30-34</b>                   | 75 089 / 71 664                                                         | 69 810 / 61 387                         | 46.72 / 66.41              | 3.51 / 5.27                                                   | 4.62 / 7.87             | 6.02 / 9.44                | 13.16 / 19.34                                                               |
| <b>35-39</b>                   | 90 372 / 87 031                                                         | 86 841 / 75 838                         | 50.20 / 68.35              | 3.95 / 5.20                                                   | 5.25 / 8.40             | 7.84 / 12.28               | 16.38 / 22.56                                                               |
| <b>40-44</b>                   | 92 686 / 89 879                                                         | 89 294 / 76 277                         | 54.63 / 69.28              | 4.10 / 5.27                                                   | 5.72 / 8.89             | 10.12 / 16.23              | 19.20 / 25.79                                                               |
| <b>45-49</b>                   | 93 082 / 91 643                                                         | 90 151 / 74 310                         | 59.23 / 72.04              | 4.32 / 5.47                                                   | 5.99 / 9.55             | 12.90 / 20.68              | 22.48 / 28.95                                                               |
| <b>50-54</b>                   | 93 252 / 90 618                                                         | 90 450 / 67 282                         | 66.50 / 77.55              | 4.87 / 5.83                                                   | 6.47 / 9.86             | 16.37 / 25.63              | 26.88 / 30.67                                                               |
| <b>55-59</b>                   | 87 280 / 84 212                                                         | 85 820 / 56 346                         | 74.43 / 82.71              | 5.09 / 5.83                                                   | 7.04 / 9.60             | 20.38 / 31.45              | 31.96 / 31.37                                                               |

1  
2  
3  
4  
5  
6  
7  
8  
9  
10  
11  
12  
13  
14  
15  
16  
17  
18  
19  
20  
21  
22  
23  
24  
25  
26  
27  
28  
29  
30  
31  
32  
33  
34  
35  
36  
37  
38  
39  
40  
41  
42  
43  
44  
45  
46  
47  
48  
49

|                    |                 |                 |               |             |             |               |               |
|--------------------|-----------------|-----------------|---------------|-------------|-------------|---------------|---------------|
| <b>60-64</b>       | 72 448 / 69 337 | 71 450 / 36 255 | 82.67 / 87.96 | 5.57 / 5.98 | 7.34 / 9.87 | 25.65 / 37.38 | 38.03 / 27.84 |
| <b>65-69</b>       | 65 430 / 66 777 | 62 572 / 23 964 | 89.09 / 91.10 | 5.88 / 5.90 | 7.97 / 9.69 | 31.21 / 43.95 | 43.09 / 21.37 |
| <b>70-74</b>       | 56 526 / 61 968 | 51 161 / 12 390 | 93.79 / 94.39 | 5.86 / 5.55 | 8.01 / 9.14 | 38.05 / 52.02 | 46.98 / 13.34 |
| <b>75-79</b>       | 45 154 / 56 939 | 35 993 / 5 000  | 93.34 / 93.00 | 5.76 / 4.74 | 7.89 / 8.21 | 44.10 / 58.52 | 46.04 / 6.28  |
| <b>80-84</b>       | 44 543 / 62 354 | 28 304 / 1 941  | 95.81 / 95.85 | 5.41 / 4.21 | 7.38 / 7.21 | 51.24 / 64.90 | 40.69 / 2.38  |
| <b>85-89</b>       | 27 547 / 46 335 | 14 160 / 429    | 99.79 / 98.09 | 4.98 / 3.66 | 7.63 / 6.57 | 56.91 / 69.24 | 35.74 / 0.74  |
| <b>90 and more</b> | 13 282 / 30 034 | 2 944 / 22      | 99.90 / 98.51 | 4.59 / 3.39 | 8.20 / 6.37 | 58.92 / 68.08 | 15.89 / 0.06  |

Abbreviations: 95CI, confidence interval.

For peer review only

Table 2. Frequency of the consumption of driving-impairing medicines

| Frequency of use | Number of DIM | Patients under treatment<br>% (95CI) |                        |                        | Drivers under treatment<br>% (95CI) |                        |                        |
|------------------|---------------|--------------------------------------|------------------------|------------------------|-------------------------------------|------------------------|------------------------|
|                  |               | Males                                | Females                | Total                  | Males                               | Females                | Total                  |
| Acute            | 1             | 97.82<br>(97.71-97.94)               | 97.17<br>(97.05-97.3)  | 97.48<br>(97.39-97.56) | 98.09<br>(97.95-98.22)              | 97.36<br>(97.16-97.57) | 97.81<br>(97.69-97.93) |
|                  | 2             | 2.16<br>(2.04-2.28)                  | 2.80<br>(2.67-2.92)    | 2.50<br>(2.41-2.58)    | 1.89<br>(1.75-2.03)                 | 2.6<br>(2.39-2.8)      | 2.16<br>(2.04-2.28)    |
|                  | 3 or more     | 0.02<br>(0.01-0.03)                  | 0.03<br>(0.02-0.05)    | 0.03<br>(0.02-0.03)    | 0.02<br>(0.01-0.04)                 | 0.04<br>(0.01-0.06)    | 0.03<br>(0.02-0.04)    |
|                  | Mean (±SD)    | 1.02<br>1.02-1.02)                   | 1.03<br>(1.03-1.03)    | 1.03<br>(1.03-1.03)    | 1.02<br>(1.02-1.02)                 | 1.03<br>(1.03-1.03)    | 1.02<br>(1.02-1.02)    |
| Sub-acute        | 1             | 71.59<br>(71.25-71.94)               | 67.39<br>(67.08-67.69) | 69.13<br>(68.90-69.35) | 71.75<br>(71.36-72.15)              | 68.59<br>(68.12-69.06) | 70.41<br>(70.1-70.71)  |
|                  | 2             | 24.71<br>(24.38-25.04)               | 27.35<br>(27.06-27.63) | 26.26<br>(26.04-26.47) | 24.53<br>(24.15-24.9)               | 26.32<br>(25.87-26.77) | 25.29<br>(25-25.58)    |
|                  | 3 or more     | 3.69<br>(3.55-3.84)                  | 5.27<br>(5.12-5.41)    | 4.62<br>(4.51-4.72)    | 3.72<br>(3.56-3.89)                 | 5.09<br>(4.86-5.31)    | 4.3<br>(4.17-4.44)     |
|                  | Mean (±SD)    | 1.32<br>(1.32-1.32)                  | 1.38<br>(1.38-1.38)    | 1.36<br>(1.36-1.36)    | 1.32<br>(1.32-1.32)                 | 1.37<br>(1.36-1.38)    | 1.34<br>(1.34-1.34)    |
| Chronic          | 1             | 31.36<br>(31.04-31.67)               | 23.84<br>(23.65-24.05) | 26.76<br>(26.58-26.93) | 30.91<br>(30.54-31.28)              | 25.58<br>(25.12-26.03) | 29.07<br>(28.78-29.36) |
|                  | 2             | 28.34<br>(28.03-28.64)               | 26.96<br>(26.74-27.17) | 27.49<br>(27.31-27.67) | 28.33<br>(27.97-28.69)              | 28.22<br>(27.75-28.68) | 28.29<br>(28-28.58)    |
|                  | 3 or more     | 40.31<br>(39.97-40.64)               | 49.20<br>(48.95-49.44) | 45.75<br>(45.56-45.95) | 40.76<br>(40.36-41.15)              | 46.21<br>(45.69-46.72) | 42.64<br>(42.33-42.95) |
|                  | Mean (±SD)    | 2.63<br>(2.62-2.64)                  | 2.96<br>(2.95-2.97)    | 2.83<br>(2.82-2.84)    | 2.65<br>(2.64-2.66)                 | 2.86<br>(2.85-2.87)    | 2.72<br>(2.71-2.73)    |
| <b>Total</b>     | Mean (±SD)    | 2.08<br>(2.07-2.09)                  | 2.39<br>(2.38-2.40)    | 2.27<br>(2.27-2.27)    | 2.1<br>(2.09-2.11)                  | 2.15<br>(2.14-2.16)    | 2.12<br>(2.11-2.13)    |

Abbreviations: 95%CI, 95% confidence interval; DIM, Driving-impairing medicines.

Table 3. Frequency of the consumption of driving-impairing medicines by ATC group.

| ATC Groups | Patients under treatment |                    |                     | Drivers under treatment |                     |                     |
|------------|--------------------------|--------------------|---------------------|-------------------------|---------------------|---------------------|
|            | % (95CI)                 |                    |                     | % (95CI)                |                     |                     |
|            | Males                    | Females            | Total               | Males                   | Females             | Total               |
| <b>A</b>   | 5.3 (5.26-5.34)          | 5.5 (5.46-5.54)    | 5.4 (5.37-5.43)     | 5.13 (5.08-5.17)        | 2.24 (2.21-2.28)    | 3.98 (3.95-4.02)    |
| <b>C</b>   | 0.36 (0.35-0.37)         | 0.26 (0.25-0.26)   | 0.31 (0.3-0.31)     | 0.32 (0.31-0.33)        | 0.04 (0.04-0.05)    | 0.21 (0.2-0.22)     |
| <b>D</b>   | 0.12 (0.12-0.13)         | 0.11 (0.1-0.11)    | 0.11 (0.11-0.12)    | 0.07 (0.07-0.08)        | 0.08 (0.07-0.09)    | 0.08 (0.07-0.08)    |
| <b>G</b>   | 0.6 (0.59-0.62)          | 1 (0.99-1.02)      | 0.81 (0.79-0.82)    | 0.52 (0.5-0.53)         | 0.49 (0.47-0.51)    | 0.51 (0.49-0.52)    |
| <b>J</b>   | 0.02 (0.02-0.03)         | 0.03 (0.03-0.04)   | 0.03 (0.03-0.03)    | 0.03 (0.02-0.03)        | 0.03 (0.02-0.03)    | 0.03 (0.02-0.03)    |
| <b>L</b>   | 0.51 (0.49-0.52)         | 0.07 (0.06-0.07)   | 0.28 (0.28-0.29)    | 0.37 (0.36-0.38)        | 0.05 (0.04-0.05)    | 0.24 (0.23-0.25)    |
| <b>M</b>   | 0.7 (0.69-0.72)          | 1.11 (1.09-1.13)   | 0.91 (0.9-0.92)     | 0.78 (0.76-0.8)         | 1.02 (0.99-1.04)    | 0.87 (0.86-0.89)    |
| <b>N</b>   | 22.45 (22.37-22.52)      | 35.68 (35.6-35.77) | 29.17 (29.12-29.23) | 21.51 (21.42-21.6)      | 21.02 (20.91-21.12) | 21.31 (21.25-21.38) |
| <b>P</b>   | 0.08 (0.07-0.08)         | 0.24 (0.23-0.25)   | 0.16 (0.15-0.16)    | 0.08 (0.07-0.09)        | 0.19 (0.18-0.2)     | 0.12 (0.12-0.13)    |
| <b>R</b>   | 3.62 (3.59-3.65)         | 4.38 (4.34-4.41)   | 4 (3.98-4.03)       | 2.51 (2.48-2.54)        | 1.98 (1.94-2.02)    | 2.3 (2.27-2.32)     |
| <b>S</b>   | 0.41 (0.4-0.42)          | 0.42 (0.41-0.43)   | 0.41 (0.41-0.42)    | 0.33 (0.32-0.35)        | 0.1 (0.09-0.1)      | 0.24 (0.23-0.25)    |
| <b>V</b>   | 0 (0-0)                  | 0 (0-0)            | 0 (0-0)             | 0 (0-0)                 | 0 (0-0)             | 0 (0-0)             |

1  
2  
3 Abbreviations: ATC, Anatomical Therapeutic Chemical Classification System; A, Alimentary tract and metabolism; B, Blood and  
4 blood forming organs; C, Cardiovascular system; D, Dermatologicals; G, Genito-urinary system and sex hormones; H, Systemic  
5 hormonal preparations, excluding sex hormones and insulins; J, Antiinfectives for systemic use; L, Antineoplastic and  
6 immunomodulating agents; M, Musculo-skeletal system; N, Nervous system; P, Antiparasitic products, insecticides and repellents; R,  
7 Respiratory system; S, Sensory organs; V, Various.  
8  
9  
10  
11  
12  
13  
14  
15  
16  
17  
18  
19  
20  
21  
22  
23  
24  
25  
26  
27  
28  
29  
30  
31  
32  
33  
34  
35  
36  
37  
38  
39  
40  
41  
42  
43  
44  
45  
46  
47  
48  
49

Table 4. Frequency of the consumption of driving-impairing medicines A, N and R ATC group.

| ATC Group | Frequency of use | Patients under treatment |                        |                        | Drivers under treatment |                        |                        |
|-----------|------------------|--------------------------|------------------------|------------------------|-------------------------|------------------------|------------------------|
|           |                  | % (95CI)                 |                        |                        | % (95CI)                |                        |                        |
|           |                  | Males                    | Females                | Total                  | Females                 | Males                  | Total                  |
| A         | Acute            | 0.68<br>(0.61-0.74)      | 1.53<br>(1.44-1.62)    | 1.12<br>(1.06-1.18)    | 0.57<br>(0.5-0.64)      | 2.22<br>(1.96-2.47)    | 0.94<br>(0.86-1.02)    |
|           | Sub-acute        | 17.7<br>(17.4 - 18)      | 29.63<br>(29.28-29.98) | 23.87<br>(23.64-24.11) | 17.69<br>(17.34-18.04)  | 53.18<br>(52.32-54.03) | 25.62<br>(25.27-25.97) |
|           | Chronic          | 81.62<br>(81.32-81.93)   | 68.84<br>(68.49-69.19) | 75.01<br>(74.77-75.24) | 81.74<br>(81.38-82.09)  | 44.6<br>(43.75-45.46)  | 73.44<br>(73.09-73.8)  |
| N         | Acute            | 18.06<br>(17.92-18.21)   | 12.79<br>(12.69-12.89) | 14.79<br>(14.7-14.87)  | 18.02<br>(17.85-18.2)   | 16.55<br>(16.34-16.75) | 17.45<br>(17.31-17.58) |
|           | Sub-acute        | 21.6<br>(21.44-21.76)    | 18.8<br>(18.68-18.91)  | 19.86<br>(19.76-19.95) | 23.53<br>(23.34-23.72)  | 25.72<br>(25.48-25.97) | 24.39<br>(24.24-24.54) |
|           | Chronic          | 60.33<br>(60.15-60.52)   | 68.41<br>(68.27-68.55) | 65.36<br>(65.24-65.47) | 58.45<br>(58.23-58.67)  | 57.73<br>(57.45-58.01) | 58.17<br>(57.99-58.34) |
| R         | Acute            | 71.93<br>(71.5-72.36)    | 74.38<br>(74.01-74.76) | 73.29<br>(73.01-73.58) | 70.21<br>(69.61-70.81)  | 78.92<br>(78.17-79.66) | 73.18<br>(72.71-73.65) |
|           | Sub-acute        | 22.63<br>(22.24-23.03)   | 21.93<br>(21.57-22.28) | 22.24<br>(21.98-22.5)  | 23.86<br>(23.3-24.42)   | 18.49<br>(17.78-19.2)  | 22.03<br>(21.58-22.47) |
|           | Chronic          | 5.43<br>(5.22-5.65)      | 3.69<br>(3.53-3.85)    | 4.46<br>(4.33-4.6)     | 5.93<br>(5.62-6.24)     | 2.59<br>(2.3-2.88)     | 4.79<br>(4.56-5.02)    |

Abbreviations: ATC, Anatomical Therapeutic Chemical Classification System; A, Alimentary tract and metabolism; N, Nervous system; R, Respiratory system

Figure 1. Frequency of medicine consumption in Castile & León in 2015.

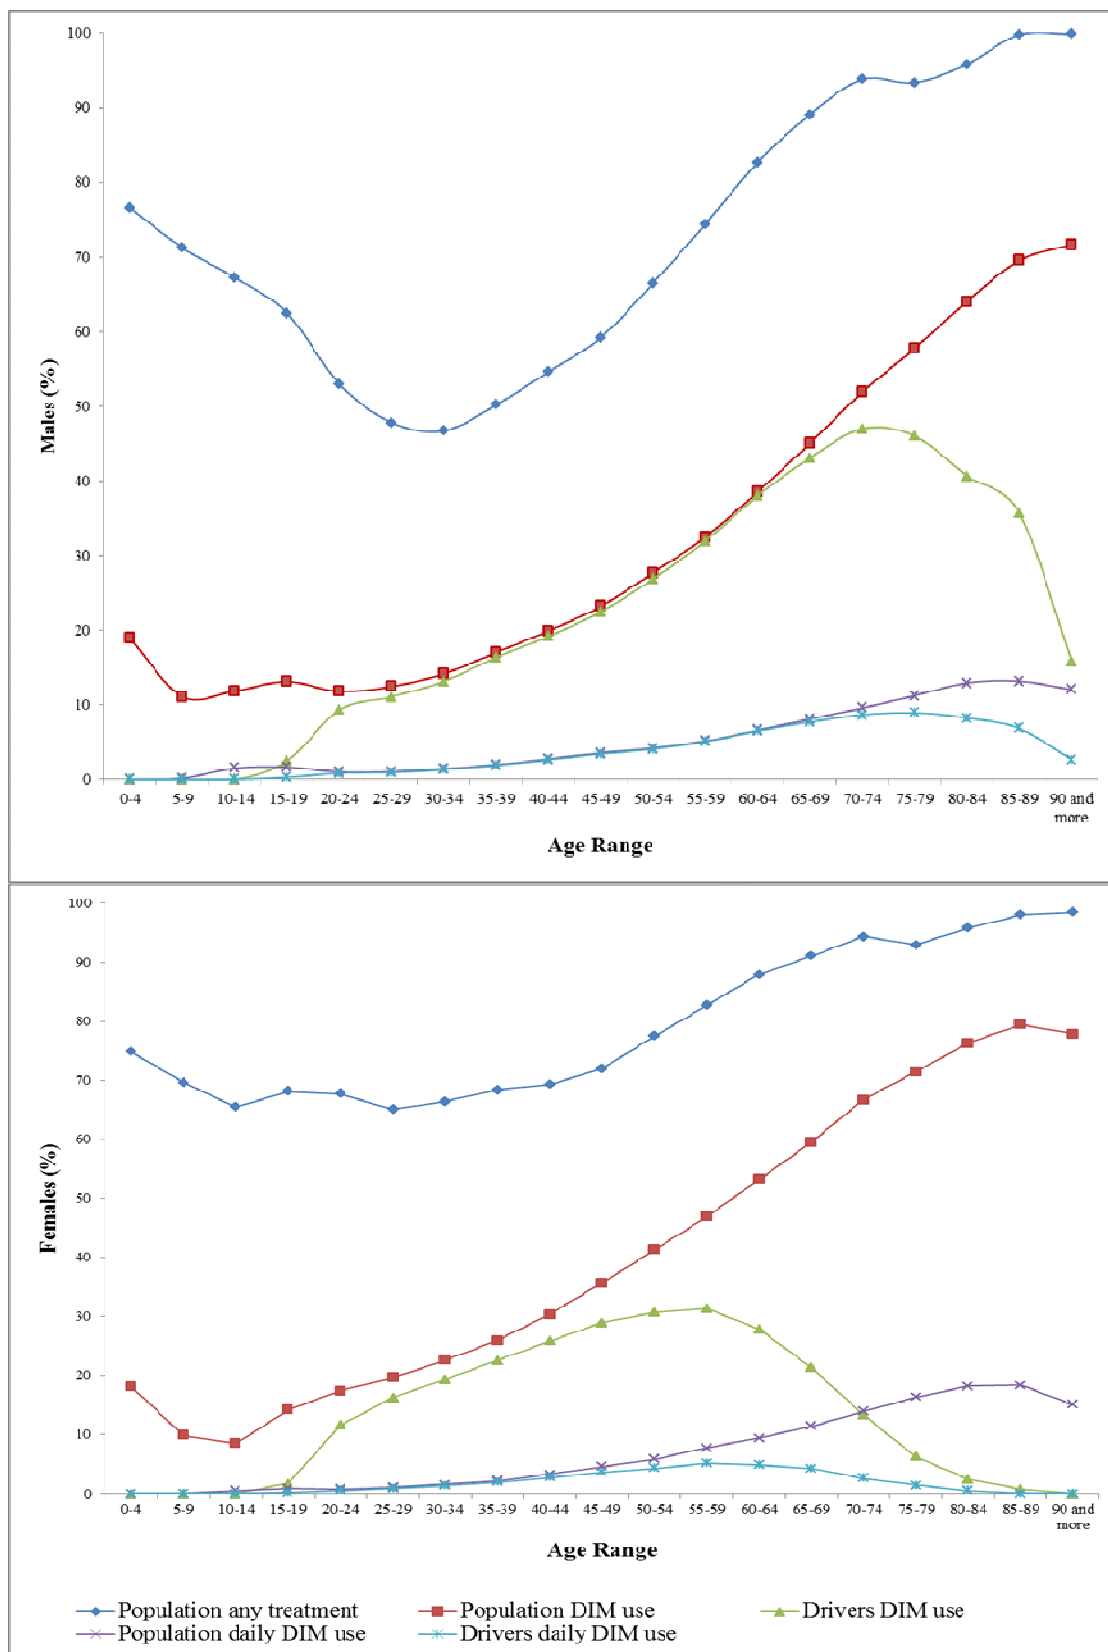



# BMJ Open

## Use of driving-impairing medicines by the population: a population-based registry study.

|                                 |                                                                                                                                                                                                                                                                                                                                                                                                                          |
|---------------------------------|--------------------------------------------------------------------------------------------------------------------------------------------------------------------------------------------------------------------------------------------------------------------------------------------------------------------------------------------------------------------------------------------------------------------------|
| Journal:                        | <i>BMJ Open</i>                                                                                                                                                                                                                                                                                                                                                                                                          |
| Manuscript ID                   | bmjopen-2017-017618.R1                                                                                                                                                                                                                                                                                                                                                                                                   |
| Article Type:                   | Research                                                                                                                                                                                                                                                                                                                                                                                                                 |
| Date Submitted by the Author:   | 04-Aug-2017                                                                                                                                                                                                                                                                                                                                                                                                              |
| Complete List of Authors:       | Gutierrez-Abejón, Eduardo; Gerencia Regional de Salud de Castilla y Leon, Technical Direction of Pharmaceutical Assistance<br>Herrera-Gómez, Francisco; Universidad de Valladolid, Pharmacology and Therapeutics<br>Criado-Espejel, Paloma; Gerencia Regional de Salud de Castilla y León, Technical Direction of Pharmaceutical Assistance<br>Alvarez, F. Javier; University of Valladolid, Pharmacology & Therapeutics |
| <b>Primary Subject Heading</b>: | Global health                                                                                                                                                                                                                                                                                                                                                                                                            |
| Secondary Subject Heading:      | Public health                                                                                                                                                                                                                                                                                                                                                                                                            |
| Keywords:                       | drug prescription, drug utilization, risk assessment, accident, traffic, automobile driving, driving-impairing medicines                                                                                                                                                                                                                                                                                                 |
|                                 |                                                                                                                                                                                                                                                                                                                                                                                                                          |

SCHOLARONE™  
Manuscripts

1  
2  
3 **Reviewed version**  
4  
5  
6  
7

8 **Use of driving-impairing medicines by the population: A population-based registry study**  
9  
10

11  
12 Eduardo Gutierrez-Abejón<sup>1</sup>, Francisco Herrera-Gómez<sup>2,3</sup>, Paloma Criado-Espejel<sup>1</sup> and F. Javier  
13  
14 Álvarez<sup>2,4</sup>  
15  
16

17  
18  
19 <sup>1</sup>Technical Direction of Pharmaceutical Assistance, Gerencia Regional de Salud de Castilla y  
20  
21 León, Valladolid, Spain.  
22  
23

24 <sup>2</sup>Pharmacology, Faculty of Medicine, University of Valladolid, Valladolid, Spain.  
25  
26

27 <sup>3</sup>Department of Nephrology, Complejo Asistencial de Zamora, Zamora, Spain.  
28

29 <sup>4</sup>CEIC/CEIm, Hospital Clínico Universitario de Valladolid, Valladolid, Spain  
30  
31  
32

33  
34 Correspondence: Professor F. Javier Álvarez, Pharmacology, Faculty of Medicine, University of  
35  
36 Valladolid, CEIC/CEIm, Hospital Clínico Universitario de Valladolid, Valladolid, Spain. Tel:  
37  
38 +34 983 423077; Fax: +34 983 423022; E-mail: [alvarez@med.uva.es](mailto:alvarez@med.uva.es)  
39

40  
41 ORCID: 0000-0002-7566-5678  
42  
43  
44

45  
46 *Running head:* Medicines and driving.  
47  
48

49  
50 *Keywords:* Accidents, Traffic. Automobile Driving. Drug Prescriptions. Drug Utilization. Risk  
51  
52 Assessment. Driving-Impairing Medicines  
53  
54

55 *Word count (excluding the title page, abstract, references, tables, and figures):* 3139  
56

57 *Number of tables:* 04

*Number of figures:* 02  
58  
59  
60

## ABSTRACT

### OBJECTIVE

To assess the use of driving-impairing medicines (DIM) in the general population with special reference to length of use and concomitant use.

### DESIGN

Population-based registry study.

### SETTING

The year 2015 granted medicines consumption data recorded in the Castile and León (Spain) medicine dispensation registry was consulted.

### PARTICIPANTS

Medicines and DIM consumers from a Spanish population (Castile & León: 2.4 million inhabitants).

### EXPOSURE

Medicines and DIM consumption. Patterns of use by age and gender based on the length of use (acute: 1-7 days, sub-chronic: 8-29 days, and chronic use:  $\geq$  30 days) were of interest. Estimations regarding the distribution of licensed drivers by age and gender were employed to determine the patterns of use of DIM.

### RESULTS:

DIM were consumed by 34.4% (95%CI 34.3-34.5) of the general population in 2015, more commonly with regularity (chronic use: 22.5% versus acute use: 5.3%), and more frequently by the elderly. On average, 2.3 DIM *per* person were dispensed, particularly to chronic users (2.8 DIM *per* person). Age and gender distribution differences were observed between the Castile and León medicine dispensation registry data and the drivers' license census data. Of all DIM

1  
2  
3 dispensed, 83.8% were in the Anatomical Therapeutic Chemical code (ATC) group nervous  
4  
5 system medicines (N), which were prescribed to 29.2% of the population.  
6  
7

#### 8 CONCLUSIONS:

9  
10 The use of DIM was frequent in the general population. Chronic use was common, but acute and  
11  
12 sub-acute use should also be considered. This finding highlights the need to make patients, health  
13  
14 professionals, health providers, medicine regulatory agencies and policy-makers at large aware of  
15  
16 the role DIM play in traffic safety.  
17  
18  
19  
20  
21  
22  
23  
24  
25  
26  
27  
28  
29  
30  
31  
32  
33  
34  
35  
36  
37  
38  
39  
40  
41  
42  
43  
44  
45  
46  
47  
48  
49  
50  
51  
52  
53  
54  
55  
56  
57  
58  
59  
60

## STRENGTHS AND LIMITATIONS OF THE STUDY

- This study explores the consumption of all driving-impairing medicines and patterns of use by age and gender corresponding to a European population.
- This highlights the need to make patients, health professionals, health providers, medicine regulatory agencies and policy-makers at large aware of the role of DIM in traffic safety.
- The information provided covers all dispensed medicines by the public health system in Spain but does not cover hospital dispensed medications or over-the-counter medicines, a portion of which may be DIM. Furthermore, no information is available on alcohol use or when the medicines were taken in relation to driving.

## BACKGROUND

Driving a motor vehicle is a multifaceted task and requires appropriate cognitive and psychomotor skills (e.g., alertness, concentration, reaction time, visual acuity).<sup>1-2</sup> Medicines can adversely affect these driving-related skills and, consequently, be a hazard to traffic safety.<sup>3-5</sup> There is increasing awareness that implementation of appropriate measures to limit the consumption of alcohol and other substances (“illicit” drugs and medicines) while driving may have an impact on road accident occurrences.<sup>6</sup> Nevertheless, to date, it is unknown how frequent the consumption of driving-impairing medicines (DIM) in the general population is, or how frequently several of these drugs are consumed concomitantly.<sup>7</sup>

Conversely, most developed countries perform toxicological analyses on road accident casualties and fatalities, and the presence of illicit drugs and medicines (either used legally or illegally) are detected.<sup>8,9</sup> On-road tests (at random or on target populations) are used ever more frequently worldwide: the on-site screening devices detect some groups of illicit drugs and certain medicines in saliva (oral fluid), with confirmation analyses being performed later.<sup>8,9</sup> In other countries, blood analyses<sup>10</sup> are performed, rather than screening of saliva. The information from these sources (data on casualties/fatalities and on-road test data) gives only a partial vision of the problem regarding medicines and driving.<sup>11</sup>

However, medicine regulatory agencies do attempt to provide appropriate information to the public concerning the problem: in the European Union, the summary of product characteristics and the package leaflets contain information on medicines that “affect the ability to drive and to use machines”.<sup>12,13</sup> Furthermore, there have been several attempts to categorize the effects of

1  
2  
3 medicines on driving<sup>14-16</sup> and several countries, such as France<sup>17</sup> and Spain,<sup>18</sup> have introduced  
4  
5 specific mandatory pictograms or ancillary warning labels, as in the Netherlands<sup>19</sup> and  
6  
7 Australia.<sup>20</sup>  
8  
9

10  
11  
12 The Spanish Law of 2007 (Royal Decree 1345/2007)<sup>18</sup> established the rule that newly authorized  
13  
14 medicines that may negatively affect fitness to drive or to handle dangerous machinery should  
15  
16 include a warning symbol (pictogram) on the outside of the packaging. Since 2011, all medicines  
17  
18 that could possibly affect fitness to drive and are commercially available in Spain have this  
19  
20 pictogram on the packaging.<sup>21</sup> As of January 2016, a total of 2013 medicinal drugs permitted in  
21  
22 Spain had been reviewed, of which 402 (20%) included the pictogram on medicines and driving  
23  
24 on the packaging.<sup>22</sup> This pictogram is well-regarded by the population.<sup>23</sup>  
25  
26  
27  
28  
29

30  
31 We have considered these medicines with the pictogram “medicines and driving” on the  
32  
33 packaging in Spain as driving impairing medicines or, to be more exact, potentially impairing  
34  
35 medicines on driving. In 2016, a national consensus on Medicines and Driving was reached in  
36  
37 Spain to determine the extent of the population taking DIM as a priority and to decipher patterns  
38  
39 of use for these drugs.<sup>24</sup> This did not apply only to motor vehicle drivers and professional drivers  
40  
41 but also the population at large, as well as to all road users, including pedestrians and the ever  
42  
43 more common cyclists. Thus, the presence of illicit drugs and medicines was also frequently  
44  
45 found in pedestrians involved in fatal road accidents.<sup>25</sup>  
46  
47  
48  
49  
50

51  
52  
53 The detection of some medicines in on-road tests has been the object of awareness-raising in  
54  
55 public and health professionals, as well as the subject of campaigns to inform the general public,  
56  
57 as in the UK.<sup>26</sup> In some countries, for instance, the UK,<sup>27</sup> Spain<sup>28</sup> or Norway,<sup>29</sup> on-road positive  
58  
59  
60

1  
2  
3 cases to medicines are not fined if they were used according to a physician's prescription. Again,  
4  
5 it is necessary that the consumption of DIM and their patterns of use should be known in detail,  
6  
7 given that there is a shortage of information about this.  
8  
9

10  
11  
12 Fitness to drive evaluations have been applied in most developed countries<sup>30,31</sup>, although the  
13  
14 procedures differ markedly. Across the European Union, there is a minimum common regulation  
15  
16 under Council Directive 439/EEC<sup>30</sup>. Within the context of a fitness to drive evaluation, an issue  
17  
18 to be considered is medication use (prescribed and over-the-counter) by the driver, although this  
19  
20 should always be assessed under the complex relation between disease-medication, particularly  
21  
22 among aged people who frequently suffer from several diseases and are poly-medicated.<sup>1,14-16</sup>  
23  
24  
25  
26  
27  
28

29  
30 Consequently, the aim of our study was to explore the use of DIM by the general population. The  
31  
32 consumption of medicines with the pictogram "medicines and driving" was assessed on the basis  
33  
34 of our dispensation registry, focusing on concomitant use of these drugs and on their length of  
35  
36 use. In addition, estimations were compared with the drivers' license census to determine the  
37  
38 patterns of use among drivers.  
39  
40  
41  
42

## 43 **METHODS**

### 44 **Study population: CONCYLIA database**

45  
46  
47  
48  
49 Access was provided to the CONCYLIA database to assess the dispensation of granted medicines  
50  
51  
52  
53  
54  
55 by the Spanish public health system in Castile and León during 2015.<sup>32</sup>  
56  
57  
58  
59  
60



1  
2  
3 Basically, the CONCYLIA database includes information on all medicine dispensations by the  
4 public health system, except those dispensed at hospitals, medical prescriptions dispensed  
5 through private medicine clinics, and those that do not require a medical prescription ('over the  
6 counter' medications).  
7  
8  
9  
10  
11

12  
13  
14  
15 We assessed medicine dispensation per person using the patient identification number; that is, for  
16 each person, any dispensation during 2015 was identified (e.g., medicinal product, number of  
17 doses, and data of dispensation). For data protection, the final database provided by the health  
18 system was anonymized, and no personal identification was included.  
19  
20  
21  
22  
23  
24  
25  
26

### 27 **Target population**

28  
29  
30  
31 The population distribution covered by the public health system and the population distribution  
32 according to the population census matched well: Castile and León had a population of 2,428,901  
33 in December 2015<sup>33</sup>, and 2,376,717 were covered by the public health system at that time  
34 (97.85% of the total).<sup>34</sup>  
35  
36  
37  
38  
39  
40  
41  
42

43 The current target population of the study was the general population at large. However, not all  
44 persons had a motor vehicle license or drove motor vehicles. Due to the lack of information on  
45 driving recorded in the CONCYLIA database, weighting was performed to adjust consumption of  
46 DIM of the general population to licensed drivers by age and gender based on the Castile and  
47 León drivers' license census data up to December 2015.<sup>35</sup> Therefore, the results are presented in  
48 regard to the general population and/or as estimates of the driver population based on weighting  
49 to the drivers' license census data (Table 1).  
50  
51  
52  
53  
54  
55  
56  
57  
58  
59  
60

## DIM

As mentioned above, granted medicines in Spain with the pictogram “medicines and driving” were considered as DIM.

In the CONCYLIA database, based on the Anatomical Therapeutic Chemical code (ATC), each one of the medicines is identified as having such a pictogram or not. This information was taken from the Spanish Medicine Agency, updated to February 1, 2016.<sup>22</sup>

## Variables and ethical issues

The following variables describing the consumption of medicines and DIM in Castile and León in the year 2015 were considered:

- i) Yearly frequency of all medicine use;
- ii) Yearly frequency of DIM use: acute (1-7 days), sub-acute (8-29 days) and chronic or regular use ( $\geq 30$  days);
- iii) Yearly frequency of daily use of at least one DIM;
- iv) Number and means of different DIM taken within 2015.

All analyses were made considering age and gender distributions.

Ethics Review Board approval was obtained (Reference number PI 16-387, approved on March 17<sup>th</sup>, 2016)

## Statistical analysis

All values are given as percentages (frequencies) with a 95% confidence interval (95%CI) or as the mean  $\pm$  standard deviations (SD). For comparisons, Student's *t* test was used for continuous variables and Pearson's chi-squared test for categorical variables. A two-tailed  $P < 0.05$  was considered to be significant. All statistical analyses were performed using the Statistical Package for Social Sciences (SPSS version 23.0.; SPSS Inc, Chicago, IL).

## RESULTS

### Descriptive mapping

A total of 48,858,588 medicines were dispensed in 2015. Approximately 3 of 4 people took a medicinal product in 2015, with more females than males taking the product (78.4% versus 68.8%,  $p < 0.05$ ), and this fraction increased with age (Table 1).

One of three (34.4%, 95%CI 34.3-34.5) consumed DIM in 2015, again more frequently among females (40.3% versus 28.3%,  $p < 0.05$ ), and this also increased with age. A majority needed to use these medicines on a regular basis (chronic use: 22.5%), while the use for a few days or weeks accounted for 5.3% and 6.6%, respectively, with similar patterns of use by age and gender (Table 1).

However, if the distribution is performed with respect to the drivers' license census, 25.4% (95%CI 25.3-25.43) of people took DIM in 2015, with more males than females (26.5% versus

1  
2  
3 23.7%,  $p < 0.05$ ) and mostly took DIM regularly (chronic use: 15.3%, 95%CI 15.2-15.32; sub-  
4  
5 acute use: 5.96%, 95%CI 5.92-5.99; acute use: 4.14%, 95%CI 4.11-4.18).  
6  
7  
8  
9

10 Figure 1 and Table 1 show those who used DIM in 2015, their distribution by age and gender,  
11 and relation to the drivers' license census. Age trends differed between the sexes with  
12 consumption dropping dramatically among female drivers from 60 years of age and male drivers  
13 using less DIM over 75 years of age.  
14  
15  
16  
17  
18  
19

20  
21  
22 At least one DIM was consumed daily by 5.6% (95%CI 5.52-5.58) of people, and by 3.7%  
23 (95%CI 3.67-3.73) of licensed drivers.  
24  
25  
26  
27  
28

29 On average (Table 2), each person taking DIM took 2.3 medicines (2.1 according to the drivers'  
30 license census data). Acute and sub-acute consumers (97.5% and 69.1%, respectively) took only  
31 one DIM, while chronic consumers (71.5%) took 2 DIM or more (mean number of DIM use:  
32 2.8). Trends between sexes were similar when the drivers' license census data were analysed  
33 (Table 2).  
34  
35  
36  
37  
38  
39  
40  
41  
42

### 43 **Types of DIM consumed**

44  
45  
46  
47

48 Of the 10,862,138 DIM dispensed, 9,102,052 (83.8%) belonged to the ATC classification group  
49 N (Nervous System), 1,176,864 (10.8%) to group A (Alimentary Tract and Metabolism) and  
50 160,631 (1.5%) to group R (Respiratory System). ATC group N medicines were prescribed to  
51 29.2% of the population (21.3% regarding the drivers' license census), group A medicines to  
52 5.4% (4% for drivers), and group R medicines to 4% (2.3% for drivers) (Table 3).  
53  
54  
55  
56  
57  
58  
59  
60

1  
2  
3  
4  
5  
6 Interestingly, ATC groups N, A and R were more frequently prescribed to females than males, all  
7  
8 people considered. When considering licensed drivers, the trends showed no differences. Table 4  
9  
10 shows DIM used for several days or weeks and chronically.  
11

## 12 13 14 15 **DISCUSSION**

16  
17  
18  
19  
20 A detailed description of the consumption of DIM in the general population from Castile and  
21  
22 León in 2015 is provided. DIM were consumed by 34.4% (95%CI 34.3–34.5) of the general  
23  
24 population and more commonly on a regular basis (22.5%). However, the use for several days  
25  
26 (5.3%) or a few weeks (6.6%) should not be neglected. The consumption of DIM increased in  
27  
28 line with age. Acute and sub-acute consumers took at least one DIM and chronic users took  
29  
30 nearly three. Of all DIM dispensed, 83.8% belong to the ATC classification group N (Nervous  
31  
32 System), which were dispensed to 29.2% of the population. Similar trends were found regarding  
33  
34 the distribution of licensed drivers by gender but not by age.  
35  
36  
37  
38  
39

40  
41 The DRUID project<sup>1</sup> provides information on the prevalence of use in Europe of some types of  
42  
43 medicines randomly detected in drivers<sup>36</sup>. Of all positive matches (1.36%), benzodiazepines  
44  
45 (0.9%), Z-drugs (0.12%), and opioids (0.35%) were frequently confirmed. Furthermore, there is  
46  
47 information for other developed countries on the consumption of alcohol, illicit drugs and certain  
48  
49 medicines by people injured/killed in road traffic accidents.<sup>8-11</sup> The DRUID study conducted on  
50  
51 injured (seriously injured or killed) people in nine European countries did not produce a clear  
52  
53 picture of the use of medicines (and illicit drugs), but combined use of alcohol with medicines  
54  
55 (and/or illicit drugs) was shown to be much more common in drivers who had accidents than in  
56  
57  
58  
59  
60

1  
2  
3 the driving population.<sup>36</sup> Although progress has been made in understanding this social and  
4  
5 medical problem of driving under the effects of medicines, the available data enable only a partial  
6  
7 view of the problem, as only several groups of DIM (mainly psychotropic drugs) have been  
8  
9 analysed in blood and oral fluid specimens from drivers. There has also been an attempt to  
10  
11 estimate DIM consumption based on dispensed medicines,<sup>7</sup> or using driver consumption  
12  
13 surveys.<sup>37</sup> Our study provides a detailed overview of all DIM used by the general population, and  
14  
15 to the best of our knowledge, this study is the first on this matter.  
16  
17  
18  
19  
20  
21

22 The combined use of DIM with alcohol is well-known to have marked effects on psychomotor  
23  
24 performance.<sup>1,5,14-16</sup> Furthermore, the risk of being seriously injured or killed while driving with  
25  
26 these psychoactive substances was highly increased with multiple use and the risk increased  
27  
28 severely with combined use with alcohol.<sup>1,36</sup> Avoiding use of alcohol is a priority for safe  
29  
30 driving,<sup>1,6</sup> but particularly for those who take medicines, either acutely or regularly.  
31  
32  
33  
34  
35

36 One of 3 used DIM in 2015. Importantly, acute users represented a sizeable proportion of all  
37  
38 drivers consuming DIM (5.3%). The effect of medications on driving is more relevant in the first  
39  
40 days of use.<sup>38,39</sup> Drivers consuming DIM for few days might therefore be the most affected,  
41  
42 particularly those taking more than one medicine, and this must be taken into account. In  
43  
44 addition, multiple daily dosing is an important factor to consider,<sup>7,40</sup> especially for drivers over 50  
45  
46 years old.<sup>40</sup>  
47  
48  
49  
50  
51  
52

53 More than 2 DIM were dispensed (drivers and non-drivers), particularly to chronic users who  
54  
55 took nearly three. In addition, approximately 6% of people consumed at least one DIM daily  
56  
57 during the year 2015. Impairment of driving seems to diminish with chronic/stable DIM use,<sup>39</sup>  
58  
59  
60

1  
2  
3 probably due to tolerance.<sup>41</sup> However, clinical explorations of fitness to drive under the effects of  
4  
5 DIM should be performed.<sup>41</sup> Tolerance is a problem that has not been completely assessed and  
6  
7  
8 what occurs when more than one medicine is consumed has also not been analysed. A higher  
9  
10 prevalence of regular and daily use of DIM are not uncommon in Spain and other developed  
11  
12 countries. Therefore our results provide an epidemiological view of the current impact of  
13  
14 medicine use patterns that highlight the importance of daily regimens, as well as the importance  
15  
16 for elderly acute users.  
17  
18  
19

20  
21  
22 Our results showed that several types of medicines are prescribed more often than others. ATC  
23  
24 group N medicines were prescribed with predilection, mostly to females. This finding was  
25  
26 corroborated by the study of Ravera *et al.*<sup>7</sup> The finding of frequent DIM use was not surprising,  
27  
28 as 20% of the granted medicines (402 of 2,013) in Spain are DIM (with the pictogram “medicines  
29  
30 and driving” on the packaging). In addition, 83.8% of dispensed DIM in Castile and León were  
31  
32 ATC group N medicines (178 of 402). In this context, mandatory pictograms and warning labels  
33  
34 contribute to awareness of DIM consumption risks for consumer engagement,<sup>42,43</sup> with the  
35  
36 noticeability of these medication warnings a challenging task.<sup>44</sup> Furthermore, there are initiatives  
37  
38 worldwide for refining information on the risk categorization of drugs<sup>1,14-16,45,46</sup> that must be  
39  
40 implemented in dispensing support tools (software)<sup>47</sup> for a better prescription/dispensation of  
41  
42  
43  
44  
45  
46 DIM.  
47  
48  
49

50  
51 Our study showed that DIM use by the population is frequent, even in young people/children,  
52  
53 who are not motorized vehicle drivers: however, all of us are road users (pedestrians). Medicinal  
54  
55 products authorized for use in children do not have the pictogram for medicines and driving in  
56  
57 Spain; however, medicines that could be used by the population, including young people, include  
58  
59  
60

1  
2  
3 it. Although the topic of medicines and driving has focused on motorized vehicles, their use by  
4  
5 cyclists and pedestrians<sup>25</sup> is a field of growing interest, especially involving road accidents.  
6  
7

8  
9  
10 Our study was based in a region of Spain. Current information from the CONCILYA medicines  
11  
12 dispensation registry shows that medication use in Castile and León does not differ from other  
13  
14 areas in Spain (as measured in Defined Daily Doses [DDD] *per* 1000 inhabitants-day)<sup>48,49</sup> and are  
15  
16 in line with those reported in other countries.<sup>7</sup> Recently, Eurostat reported on medicine use in the  
17  
18 European Union.<sup>50</sup> In the European health interview survey, conducted between 2013 and 2015,  
19  
20 people were asked about self-reported medicine use. Our data by gender and age range agree well  
21  
22 with these results, although figures from the Eurostat refer to medicine use in the two weeks prior  
23  
24 to the survey, and the current data were based on any medicine dispensed in 2015. Therefore,  
25  
26 although considered with caution due to possible country variations, the figures from the present  
27  
28 study could be generalized to other developed countries.  
29  
30  
31  
32  
33

34  
35  
36 Our study provides detailed information on which DIM are consumed and how. We thus fulfilled  
37  
38 the objectives of the Spanish consensus on Medicines and Driving reached recently. Giving  
39  
40 clearer information about the influence of medicines on driving to sensitize health professionals  
41  
42 and the general population on the negative effects of DIM is a priority.<sup>24</sup> Our results stress the  
43  
44 need to improve the communication of DIM risks, in line with recent requirements. Nevertheless,  
45  
46 DIM risk communication is a complex clinical, methodological and epidemiological challenge,  
47  
48 and the “boosters” (warning label methods, dispensation software, information campaigns, etc.)  
49  
50 should be cautiously implemented in key steps, with the main objective to minimize road  
51  
52 accidents. Again, detailed knowledge of the use of DIM is a priority.  
53  
54  
55  
56  
57  
58  
59  
60



1  
2  
3 This study has several limitations. The health system in Spain is public and free, and we used the  
4 data from a medicine dispensation registry, which implies that the information covers all  
5 dispensed medicines within such a system but not hospital dispensed medications or over-the-  
6 counter medicines, several of which may not have the Spanish pictogram. Data are presented  
7 regarding the general population, not only drivers, because even pedestrians and cyclists could be  
8 involved in road traffic accidents with DIM being a possible cause.<sup>25</sup> In the CONCYLIA  
9 database, no information on medicine use by drivers is recorded, and weighting was performed to  
10 adjust the consumption of DIM among licensed drivers by age and gender based on the Castile &  
11 León drivers' license census data. This should be taken into account, as the distribution of drivers  
12 in other countries or regions could be different, and especially because information is not  
13 available on the extent to which drivers with a license drove vehicles. Furthermore, we do not  
14 have information on patterns of alcohol use or on driving patterns. Importantly, the effect of  
15 drugs on driver behaviour (and crash risk) depends on when the drug was taken in relation to  
16 driving. Our study showed that a high percentage of drivers are taking DIM and are frequently  
17 taking several DIM. However, we do not have information about when the drivers took the  
18 medications; for example, they may have taken them at a time when their driving was unlikely to  
19 be impaired (i.e., before bed).  
20  
21  
22  
23  
24  
25  
26  
27  
28  
29  
30  
31  
32  
33  
34  
35  
36  
37  
38  
39  
40  
41  
42  
43  
44

## 45 CONCLUSIONS

46  
47  
48  
49  
50 The use of DIM was frequent in the general population based on the findings of Castile and León  
51 in 2015. Chronic use (30 days or more) was common, but acute use (1-7 days) and sub-acute use  
52 (8-29 days) must not be overlooked because they might be the most relevant regarding DIM  
53 consumption and risks. ATC group N medicines were the most frequently prescribed.  
54  
55  
56  
57  
58  
59  
60

1  
2  
3  
4  
5  
6 There is a need worldwide to improve interventions in the field of medicines and driving.<sup>1,6</sup>  
7  
8 Interventions have been suggested for such populations as the general public (information,  
9  
10 awareness of risks for DIM use on driving),<sup>1,45</sup> for health professionals (e.g., risk  
11  
12 communications to the patients, categorization systems, fitness to drive evaluation),<sup>15,16</sup> for health  
13  
14 provider systems (prescribing and dispensation software tools),<sup>16,47</sup> for health  
15  
16 authorities/medicinal regulatory agencies for improving medicinal product labelling systems and  
17  
18 inserted patient information leaflets,<sup>23,42-44</sup> and for road safety policy-makers.<sup>1,6,45</sup>  
19  
20  
21  
22  
23  
24  
25  
26  
27  
28  
29  
30  
31  
32  
33  
34  
35  
36  
37  
38  
39  
40  
41  
42  
43  
44  
45  
46  
47  
48  
49  
50  
51  
52  
53  
54  
55  
56  
57  
58  
59  
60

### **Contributors**

F.J.A. conceived the study design. E.G.-A. conducted the study. E.G.-A., F.H.-G., P.C.-E. and

F.J.A. analysed the data, contributed to the interpretation of the results, and wrote the manuscript.

All authors reviewed and approved the final version of the manuscript.

### **Funding**

This work was supported by the Dirección General de Tráfico (DGT) reference: SP IP2017-02120.

### **Competing Interests**

No competing interests.

### **Data sharing statement**

No additional data are available

## REFERENCES

1. Schulze H, Schumacher M, Urmeew R, Auerbach K, Alvarez FJ, Bernhoft IM, de Gier JJ, Hagenzieker M, Houwing S, Knoche A, Pilgerstorfer M, Zlender B. Driving under the influence of drugs, alcohol and medicines in europe — findings from the DRUID project. Lisbon, Portugal: EMCDDA. 2012. <http://www.emcdda.europa.eu/publications/thematic-papers/druid> (Accessed 9 January 2017)
2. Ramaekers JG. Drugs and Driving Research in Medicinal Drug Development. Trends Pharmacol Sci 2017; 38: 319-21.
3. Ravera S, van Rein N, de Gier JJ, de Jong-van den Berg LT. Road traffic accidents and psychotropic medication use in The Netherlands: a case-control study. Br J Clin Pharmacol 2011; 72: 505-13.
4. Orriols L, Delorme B, Gadegbeku B, Tricotel A, Contrand B, Laumon B, Salmi LR, Lagarde E; CESIR research group. Prescription medicines and the risk of road traffic crashes: a French registry-based study. PLoS Med 2010; 16: e1000366.
5. Berghaus G, Sticht G, Grellner W, Lenz D, Naumann TH, Wiesenmüller S. Meta-analysis of empirical studies concerning the effects of medicines and illegal drugs including pharmacokinetics on safe driving. DRUID project Deliverable 1.1.2b. Cologne, Germany: BAST. 2010. [http://www.druid-project.eu/Druid/EN/deliverables-list/downloads/Deliverable\\_1\\_1\\_2\\_B.pdf?\\_blob=publicationFile&v=1](http://www.druid-project.eu/Druid/EN/deliverables-list/downloads/Deliverable_1_1_2_B.pdf?_blob=publicationFile&v=1) (Accessed 17 July 2017).
6. WHO. Drug use and road safety: a policy brief. Geneva, Switzerland: World Health Organization. 2016. <http://www.who.int/iris/handle/10665/249533> (Accessed 9 January 2017).

- 1  
2  
3 7. Ravera S, Hummel SA, Stolk P, Heerdink RE, de Jong-van den Berg LT, de Gier JJ. The use  
4 of driving impairing medicines: a European survey. *Eur J Clin Pharmacol* 2009; 65: 1139-47.  
5  
6
- 7  
8 8. Gómez-Talegón T, Fierro I, González-Luque JC, Colás M, López-Rivadulla M, Javier  
9 Álvarez F. Prevalence of psychoactive substances, alcohol, illicit drugs, and medicines, in  
10 Spanish drivers: a roadside study. *Forensic Sci Int* 2012; 223: 106-13.  
11  
12
- 13  
14 9. Simonsen KW, Steentoft A, Hels T, Bernhoft IM, Rasmussen BS, Linnet K. Presence of  
15 psychoactive substances in oral fluid from randomly selected drivers in Denmark. *Forensic*  
16  
17  
18  
19  
20  
21  
22  
23  
24  
25  
26  
27  
28  
29  
30  
31  
32  
33  
34  
35  
36  
37  
38  
39  
40  
41  
42  
43  
44  
45  
46  
47  
48  
49  
50  
51  
52  
53  
54  
55  
56  
57  
58  
59  
60  
10. Bezemer KD, Smink BE, van Maanen R, Verschraagen M, de Gier JJ. Prevalence of  
medicinal drugs in suspected impaired drivers and a comparison with the use in the general  
Dutch population. *Forensic Sci Int* 2014; 241: 203-11.
11. Rudisill TM, Zhao S, Abate MA, Coben JH, Zhu M. Trends in drug use among drivers killed  
in U.S. traffic crashes, 1999-2010. *Accid Anal Prev* 2014; 70: 178-87.
12. Council Directive 83/570/EEC of 26 October 1983 amending Directives 65/65/EEC,  
75/318/EEC and 75/319/EEC on the approximation of provisions laid down by law,  
regulation or administrative action relating to proprietary medicinal products. OJ L 332,  
28.11.1983, p. 1–10. <http://data.europa.eu/eli/dir/1983/570/oj> (Accessed 9 January 2017)
13. European Commission. Enterprise and Industry Directorate-General A guideline on summary  
of product characteristics (SmPC) 2009. [http://ec.europa.eu/health/files/eudralex/vol-2/c/smpc\\_guideline\\_rev2\\_en.pdf](http://ec.europa.eu/health/files/eudralex/vol-2/c/smpc_guideline_rev2_en.pdf) and [http://ec.europa.eu/health/documents/eudralex/vol-2/index\\_en.htm](http://ec.europa.eu/health/documents/eudralex/vol-2/index_en.htm) (Accessed 9 January 2017)
14. de Gier JJ, Alvarez FJ, Mercier-Guyon C, Verstraete AG. Prescribing and dispensing  
guidelines for medicinal drugs affecting driving performance. In: *Drugs, Driving and Traffic*

- 1  
2  
3 Safety, eds Verster JC, Pandi-Perumal SR, Ramaekers JG, de Gier JJ. Basel, Switzerland:  
4  
5 Birkaeuser Verlag AG. 2009: 121-34.  
6  
7  
8  
9 15. Gómez-Talegón T, Fierro I, Del Río MC, Álvarez FJ, Ravera S, Monteiro S, de Gier JJ, Van  
10  
11 der Linden G, Legrand SA, Pil K, Verstraete A, Mallaret M, Mercier-Guyon C, Mercier-  
12  
13 Guyon I, Touliou K, Heißing M. Establishment of framework for classification/categorisation  
14  
15 and labelling of medicinal drugs and driving. DRUID project Deliverable 4.3.1. Cologne,  
16  
17 Germany: BAST. 2011. [http://www.druid-project.eu/Druid/EN/deliverables-](http://www.druid-project.eu/Druid/EN/deliverables-list/downloads/Deliverable_4_3.pdf?_blob=publicationFile&v=1)  
18  
19 [list/downloads/Deliverable\\_4\\_3.pdf?\\_blob=publicationFile&v=1](http://www.druid-project.eu/Druid/EN/deliverables-list/downloads/Deliverable_4_3.pdf?_blob=publicationFile&v=1) (Accessed 17 July 2017)  
20  
21  
22  
23 16. Ravera S, Monteiro S, de Gier J J, van der Linden T, Gómez-Talegón T, Álvarez FJ. & the  
24  
25 DRUID Project WP4 Partner. A European approach to categorizing medicines for fitness to  
26  
27 drive: Outcomes of the DRUID project. Br J Clin Pharmacol 2012; 74: 920-31.  
28  
29  
30  
31 17. Ministère de la Santé et des Solidarités. Direction Generale de la Santé. Arrêté du 18 Juillet  
32  
33 2005 pris pour l'application de l'article R.5121-139 du code de la santé publique et relative à  
34  
35 l'opposition d'un pictogramme sur le conditionnement extérieur de certain médicaments et  
36  
37 produits. Journal Officiel de la République Française. Août 2005 (SAN/P0522726A).  
38  
39  
40  
41 18. Real Decreto 1345/2007, de 11 de octubre, por el que se regula el procedimiento de  
42  
43 autorización, registro y condiciones de dispensación de los medicamentos de uso humano  
44  
45 fabricados industrialmente. pp. 45652–45698. BOE de 7 de Noviembre de 2007.  
46  
47 [http://www.boe.es/diario\\_boe/txt.php?id=BOE-A-2007-19249](http://www.boe.es/diario_boe/txt.php?id=BOE-A-2007-19249) (Accessed 9 January 2017).  
48  
49  
50 19. Patrício Monteiro S. Driving-impairing Medicines and Traffic Safety: Patient's Perspectives.  
51  
52 PhD thesis. Groningen, The Netherlands; University of Groningen. 2014.  
53  
54 [http://www.rug.nl/research/portal/files/6563594/volledigedissertatie\\_1\\_.pdf](http://www.rug.nl/research/portal/files/6563594/volledigedissertatie_1_.pdf) (Accessed 9  
55  
56  
57  
58  
59  
60

- 1  
2  
3  
4  
5  
6  
7  
8  
9  
10  
11  
12  
13  
14  
15  
16  
17  
18  
19  
20  
21  
22  
23  
24  
25  
26  
27  
28  
29  
30  
31  
32  
33  
34  
35  
36  
37  
38  
39  
40  
41  
42  
43  
44  
45  
46  
47  
48  
49  
50  
51  
52  
53  
54  
55  
56  
57  
58  
59  
60
20. Jomaa I, Odisho M, Cheung JM, Wong K, Ellis JG, Smyth T, et al. Pharmacists' perceptions and communication of risk for alertness impairing medications. *Res Social Adm Pharm*. 2017, in press.  
<https://doi.org/10.1016/j.sapharm.2016.12.010>
21. Agencia Española de Medicamentos y Productos Sanitarios. Medicamentos y Conduccion. <http://www.aemps.gob.es/industria/etiquetado/conduccion/home.htm> (Accessed 9 July 2016)
22. Agencia Española de Medicamentos y Productos Sanitarios. Medicamentos y Conduccion: Listados de principios activos por grupos ATC\* e incorporación del pictograma de la conducción  
<http://www.aemps.gob.es/industria/etiquetado/conduccion/listadosPrincipios/home.htm>  
(Accessed 9 July 2016)
23. Fierro I, Gómez-Talegón T, Alvarez FJ. The Spanish pictogram on medicines and driving: The population's comprehension of and attitudes towards its use on medication packaging. *Accid Anal Prev* 2013; 50: 1056-61.
24. Documento de consenso sobre medicamentos y conducción en España: información a la población general y papel de los profesionales sanitarios. Madrid, Spain: Ministerio de Sanidad, Servicios Sociales e Igualdad and Ministerio del Interior. 2016.  
[http://www.msssi.gob.es/profesionales/saludPublica/prevPromocion/docs/Medicamentos\\_conduccion\\_DocConsenso.pdf](http://www.msssi.gob.es/profesionales/saludPublica/prevPromocion/docs/Medicamentos_conduccion_DocConsenso.pdf) (Accessed 10 May 2016)
25. Instituto Nacional de Toxicología y Ciencias Forenses. Víctimas mortales en accidentes de tráfico: memoria 2016. Madrid, Spain: Ministerio de Justicia. 2016.  
[https://administraciondejusticia.gob.es/paj/PA\\_WebApp\\_SGNTJ\\_NPAJ/descarga/Memoria%20Trafico%20INTCF202014.pdf?idFile=00359cf9-26d5-4d33-96ea-ec9703c78470](https://administraciondejusticia.gob.es/paj/PA_WebApp_SGNTJ_NPAJ/descarga/Memoria%20Trafico%20INTCF202014.pdf?idFile=00359cf9-26d5-4d33-96ea-ec9703c78470)  
(Accessed 9 January 2017).

- 1  
2  
3 26. GOV:UK. Drugs and driving: the law. Collection Drug driving. [https://www.gov.uk/drug-](https://www.gov.uk/drug-driving-law)  
4 [driving-law](https://www.gov.uk/drug-driving-law) (Accessed 9 January 2017). [https://www.gov.uk/government/collections/drug-](https://www.gov.uk/government/collections/drug-driving#table-of-drugs-and-limits)  
5 [driving#table-of-drugs-and-limits](https://www.gov.uk/government/collections/drug-driving#table-of-drugs-and-limits) (Accessed 9 January 2017).  
6  
7  
8  
9  
10 27. Department for Transport. Guidance for healthcare professionals on drug driving. London,  
11 United Kingdom: Department for Transport. 2014.  
12 [https://www.gov.uk/government/uploads/system/uploads/attachment\\_data/file/325275/health](https://www.gov.uk/government/uploads/system/uploads/attachment_data/file/325275/health_care-profs-drug-driving.pdf)  
13 [care-profs-drug-driving.pdf](https://www.gov.uk/government/uploads/system/uploads/attachment_data/file/325275/health_care-profs-drug-driving.pdf) (Accessed 9 January 2017).  
14  
15  
16  
17  
18 28. Álvarez FJ, González-Luque JC, Seguí-Gómez M. Drugs, Substance Use Disorder and  
19 Driving: Intervention of Health Professionals in the Treatment of Addictions. *Adicciones*  
20 2015; 27: 161-7.  
21  
22  
23  
24  
25  
26  
27 29. Norwegian Ministry of Transport and Communications. Driving under the influence of non-  
28 alcohol drugs-legal limits implemented in Norway. Oslo, Norway: Norwegian Government  
29 Security and Service Organization. 2014.  
30 [https://www.regjeringen.no/globalassets/upload/sd/vedlegg/brosjyrer/sd\\_ruspavirket\\_kjoring](https://www.regjeringen.no/globalassets/upload/sd/vedlegg/brosjyrer/sd_ruspavirket_kjoring_net.pdf)  
31 [net.pdf](https://www.regjeringen.no/globalassets/upload/sd/vedlegg/brosjyrer/sd_ruspavirket_kjoring_net.pdf) (Accessed 9 January 2017)  
32  
33  
34  
35  
36  
37  
38 30. Council Directive 91/439/EEC of 29 July 1991 on driving licences. *Official Journal*, 1991; L  
39 237: 0001-0024. <http://eur-lex.europa.eu/legal-content/ES/TXT/?uri=CELEX:31991L0439>  
40 (Accessed 17 July2017).  
41  
42  
43  
44  
45  
46 31. Austroads. Assessing Fitness to drive for commercial and private vehicle drivers. Fifth  
47 Edition. Sydney, Australia: Austroads Ltd., 2016.  
48 <https://www.onlinepublications.austroads.com.au/downloads/AP-G56-16> (Accessed 17  
49 July2017).  
50  
51  
52  
53  
54  
55  
56  
57  
58  
59  
60



- 1  
2  
3 32. CONCYLIA. Sistema de Información de Farmacia. Gerencia Regional de Salud de Castilla y  
4  
5 León. Valladolid, Spain: Junta de Castilla y León.  
6  
7  
8 33. Instituto Nacional de Estadística. Cifras oficiales de población de los municipios españoles:  
9  
10 Revisión del Padrón Municipal. Madrid, Spain.  
11  
12 [http://www.ine.es/dyngs/INEbase/es/operacion.htm?c=Estadistica\\_C&cid=1254736177011&](http://www.ine.es/dyngs/INEbase/es/operacion.htm?c=Estadistica_C&cid=1254736177011&menu=resultados&secc=1254736195458&idp=1254734710990)  
13 [menu=resultados&secc=1254736195458&idp=1254734710990](http://www.ine.es/dyngs/INEbase/es/operacion.htm?c=Estadistica_C&cid=1254736177011&menu=resultados&secc=1254736195458&idp=1254734710990) (Accessed 15 Jun 2016)  
14  
15  
16  
17 34. Tarjeta Sanitaria de SACYL. Recursos y Gestión Poblacional. Gerencia Regional de Salud.  
18  
19 2015. Valladolid, Spain: Junta de Castilla y León.  
20  
21  
22 35. Ministerio del Interior. Dirección General de Tráfico. Estadísticas e Indicadores. Permisos de  
23  
24 conducción. [http://www.dgt.es/es/seguridad-vial/estadisticas-e-indicadores/permisos-](http://www.dgt.es/es/seguridad-vial/estadisticas-e-indicadores/permisos-conduccion/)  
25 [conduccion/](http://www.dgt.es/es/seguridad-vial/estadisticas-e-indicadores/permisos-conduccion/) (Accessed 15 June 2016).  
26  
27  
28  
29 36. Bernhoft IM (coordinator). Results from epidemiological research - prevalence, risk and  
30  
31 characteristics of impaired drivers. DRUID project Deliverable 2.4.1. Cologne, Germany:  
32  
33 BAST. 2011. [http://www.druid-project.eu/Druid/EN/deliverables-](http://www.druid-project.eu/Druid/EN/deliverables-list/downloads/Deliverable_2_4_1.pdf?blob=publicationFile&v=1)  
34 [list/downloads/Deliverable\\_2\\_4\\_1.pdf? blob=publicationFile&v=1](http://www.druid-project.eu/Druid/EN/deliverables-list/downloads/Deliverable_2_4_1.pdf?blob=publicationFile&v=1) (Accessed 20 July 2017)  
35  
36  
37  
38 37. Del Río MC, Alvarez FJ. Medication and fitness to drive. *Pharmacoepidemiol Drug Saf* 2003;  
39  
40 12: 389-94.  
41  
42  
43 38. Barbone F, McMahon AD, Davey PG, Morris AD, Reid IC, McDevitt DG, MacDonald TM.  
44  
45 Association of road-traffic accidents with benzodiazepine use. *Lancet* 1998; 352: 1331-6.  
46  
47  
48 39. Wilhelmi BG, Cohen SP. A framework for "driving under the influence of drugs" policy for  
49  
50 the opioid using driver. *Pain Physician* 2012; 115(3 Suppl): ES215-30.  
51  
52  
53 40. Monárrez-Espino J, Laflamme L, Elling B, Möller J. Number of medications and road traffic  
54  
55 crashes in senior Swedish drivers: a population-based matched case-control study. *Inj Prev*  
56  
57 2014; 20: 81-7.  
58  
59  
60

- 1  
2  
3 41. Schumacher MB, Jongen S, Knoche A, Petzke F, Vuurman EF, Vollrath M, Ramaekers JG.  
4  
5 Effect of chronic opioid therapy on actual driving performance in non-cancer pain patients.  
6  
7 Psychopharmacology (Berl) 2017; 234: 989-99.  
8  
9
- 10 42. Monteiro SP, Huiskes R, Van Dijk L, Van Weert JC, De Gier JJ. How effective are  
11  
12 pictograms in communicating risk about driving-impairing medicines? Traffic Inj Prev 2013;  
13  
14 14: 299-308.  
15  
16
- 17 43. Emich B, van Dijk L, Monteiro SP, de Gier JJ. A study comparing the effectiveness of three  
18  
19 warning labels on the package of driving-impairing medicines. Int J Clin Pharm 2014; 366:  
20  
21 1152-9.  
22  
23
- 24 44. Smyth T, Sheehan M, Siskind V, Mercier-Guyon C, Mallaret M. Consumer perceptions of  
25  
26 medication warnings about driving: a comparison of French and Australian labels. Traffic Inj  
27  
28 Prev 2013; 14: 557-64.  
29  
30  
31
- 32 45. Schulze H, Schumacher M, Urmeew R, Auerbach K. DRUID (Driving Under the Influence of  
33  
34 Drugs, Alcohol and Medicines) project. Final Report: Work performed, main results and  
35  
36 recommendations. DRUID project Deliverable 0.1.8. Revision 2.0. Cologne, Germany:  
37  
38 BAST. 2010. [http://www.druid-](http://www.druid-project.eu/Druid/EN/Dissemination/downloads_and_links/Final_Report.pdf?__blob=publicationFile&v=1)  
39  
40 [project.eu/Druid/EN/Dissemination/downloads\\_and\\_links/Final\\_Report.pdf?\\_\\_blob=publicati](http://www.druid-project.eu/Druid/EN/Dissemination/downloads_and_links/Final_Report.pdf?__blob=publicationFile&v=1)  
41  
42 [onFile&v=1](http://www.druid-project.eu/Druid/EN/Dissemination/downloads_and_links/Final_Report.pdf?__blob=publicationFile&v=1) (Accessed 9 January 2017).  
43  
44  
45
- 46 46. International Council on Alcohol, Drugs and Traffic Safety (ICADTS): Working Group on  
47  
48 Prescribing and Dispensing Guidelines for Medicinal Drugs Affecting Driving Performance.  
49  
50 Utrecht, The Netherland: ICADTS. 2001. Available at <http://www.icadts.nl/medicinal.html>  
51  
52 (Accessed 9 July 2016).  
53  
54  
55  
56  
57  
58  
59  
60

- 1  
2  
3 47. Legrand SA, Boets S, Meesmann U, Verstraete AG. Medicines and driving: evaluation of  
4 training and software support for patient counselling by pharmacists. *Int J Clin Pharm* 2012;  
5 34: 633-43.  
6  
7  
8  
9  
10 48. Agencia Española de Medicamentos y Productos Sanitarios. Utilización de medicamentos  
11 ansiolíticos e hipnóticos en España durante el periodo 2000-2012. Informe de Utilización de  
12 Medicamentos U/HAY/V1/17012014. 2014  
13 [https://www.aemps.gob.es/medicamentosUsoHumano/observatorio/docs/ansioliticos\\_hipnoti](https://www.aemps.gob.es/medicamentosUsoHumano/observatorio/docs/ansioliticos_hipnoticos-2000-2012.pdf)  
14 [cos-2000-2012.pdf](https://www.aemps.gob.es/medicamentosUsoHumano/observatorio/docs/ansioliticos_hipnoticos-2000-2012.pdf) (Accessed 20 July 2017)  
15  
16  
17  
18  
19  
20  
21 49. Agencia Española de Medicamentos y Productos Sanitarios. Utilización de medicamentos  
22 antidepressivos en España durante el periodo 2000-2013. Informe de Utilización de  
23 Medicamentos U/AD/V1/14012015. 2015.  
24 [https://www.aemps.gob.es/medicamentosUsoHumano/observatorio/docs/antidepressivos-](https://www.aemps.gob.es/medicamentosUsoHumano/observatorio/docs/antidepressivos-2000-2013.pdf)  
25 [2000-2013.pdf](https://www.aemps.gob.es/medicamentosUsoHumano/observatorio/docs/antidepressivos-2000-2013.pdf) (Accessed 20 July 2017)  
26  
27  
28  
29  
30  
31  
32  
33 50. EUROSAT statistics explained. Medicine use statistics. [http://ec.europa.eu/eurostat/statistics-](http://ec.europa.eu/eurostat/statistics-explained/index.php/Medicine_use_statistics#Prescribed_medicines)  
34 [explained/index.php/Medicine\\_use\\_statistics#Prescribed\\_medicines](http://ec.europa.eu/eurostat/statistics-explained/index.php/Medicine_use_statistics#Prescribed_medicines) (Accessed 20 July 2017)  
35  
36 [http://ec.europa.eu/eurostat/statistics-explained/index.php/File:Self-](http://ec.europa.eu/eurostat/statistics-explained/index.php/File:Self-reported_use_of_prescribed_medicines_by_age_and_sex_2014_(%25).png)  
37 [reported\\_use\\_of\\_prescribed\\_medicines\\_by\\_age\\_and\\_sex\\_2014\\_\(%25\).png](http://ec.europa.eu/eurostat/statistics-explained/index.php/File:Self-reported_use_of_prescribed_medicines_by_age_and_sex_2014_(%25).png)  
38  
39  
40  
41  
42  
43 (Accessed 20 July 2017)  
44  
45  
46  
47  
48  
49  
50  
51  
52  
53  
54  
55  
56  
57  
58  
59  
60

Table 1. Data on consumption of medicines according to the CONCYLIA database and drivers' license census

|                                | Population in Castile & León with health insurance card (December 2015) | Drivers' license census (December 2015) | All medicines % (95%CI)    | Medicines with the pictogram "Medicines and Driving" % (95%CI) |                         |                            | Drivers using medicines with the pictogram "Medicines and Driving" % (95%CI) |
|--------------------------------|-------------------------------------------------------------------------|-----------------------------------------|----------------------------|----------------------------------------------------------------|-------------------------|----------------------------|------------------------------------------------------------------------------|
|                                |                                                                         |                                         |                            | Acute                                                          | Sub-acute               | Chronic                    |                                                                              |
| <b>TOTAL</b>                   | <b>2 376 717</b>                                                        | <b>1 470 389</b>                        | <b>73.69 (73.63–73.75)</b> | <b>5.31 (5.28–5.34)</b>                                        | <b>6.64 (6.61–6.67)</b> | <b>22.46 (22.41–22.51)</b> | <b>25.36 (25.29–25.43)</b>                                                   |
| <b>Sex</b>                     |                                                                         |                                         |                            |                                                                |                         |                            |                                                                              |
| <b>Male</b>                    | 1 168 591                                                               | 887 357                                 | 68.78 (68.70–68.86)        | 5.06 (5.02–5.10)                                               | 5.58 (5.54–5.62)        | 17.69 (17.62–17.76)        | 26.46 (26.37–26.55)                                                          |
| <b>Female</b>                  | 1 208 126                                                               | 583 032                                 | 78.43 (78.36–78.50)        | 5.56 (5.52–5.60)                                               | 7.66 (7.61–7.71)        | 27.06 (26.98–27.14)        | 23.69 (23.58–23.8)                                                           |
| <b>Age range (Male/Female)</b> |                                                                         |                                         |                            |                                                                |                         |                            |                                                                              |
| <b>0-4</b>                     | 45 405 / 42 504                                                         | -                                       | 76.59 / 74.86              | 15.61 / 15.31                                                  | 2.81 / 2.37             | 0.52 / 0.43                | -                                                                            |
| <b>5-9</b>                     | 50 925 / 48 078                                                         | -                                       | 71.22 / 69.60              | 6.82 / 7.05                                                    | 1.57 / 1.34             | 2.73 / 1.50                | -                                                                            |
| <b>10-14</b>                   | 49 439 / 47 220                                                         | -                                       | 67.24 / 65.53              | 3.47 / 3.86                                                    | 1.48 / 1.49             | 6.92 / 3.12                | -                                                                            |
| <b>15-19</b>                   | 48 620 / 46 904                                                         | 9 282 / 5 586                           | 62.49 / 68.16              | 3.17 / 4.18                                                    | 2.88 / 4.71             | 7.06 / 5.33                | 2.50 / 1.69                                                                  |
| <b>20-24</b>                   | 54 724 / 53 382                                                         | 43 294 / 35 387                         | 53.00 / 67.78              | 3.48 / 4.77                                                    | 3.81 / 6.75             | 4.51 / 5.87                | 9.34 / 11.53                                                                 |
| <b>25-29</b>                   | 62 787 / 61 247                                                         | 55 831 / 50 618                         | 47.83 / 65.06              | 3.51 / 5.06                                                    | 4.15 / 7.36             | 4.81 / 7.23                | 11.09 / 16.24                                                                |
| <b>30-34</b>                   | 75 089 / 71 664                                                         | 69 810 / 61 387                         | 46.72 / 66.41              | 3.51 / 5.27                                                    | 4.62 / 7.87             | 6.02 / 9.44                | 13.16 / 19.34                                                                |
| <b>35-39</b>                   | 90 372 / 87 031                                                         | 86 841 / 75 838                         | 50.20 / 68.35              | 3.95 / 5.20                                                    | 5.25 / 8.40             | 7.84 / 12.28               | 16.38 / 22.56                                                                |
| <b>40-44</b>                   | 92 686 / 89 879                                                         | 89 294 / 76 277                         | 54.63 / 69.28              | 4.10 / 5.27                                                    | 5.72 / 8.89             | 10.12 / 16.23              | 19.20 / 25.79                                                                |
| <b>45-49</b>                   | 93 082 / 91 643                                                         | 90 151 / 74 310                         | 59.23 / 72.04              | 4.32 / 5.47                                                    | 5.99 / 9.55             | 12.90 / 20.68              | 22.48 / 28.95                                                                |
| <b>50-54</b>                   | 93 252 / 90 618                                                         | 90 450 / 67 282                         | 66.50 / 77.55              | 4.87 / 5.83                                                    | 6.47 / 9.86             | 16.37 / 25.63              | 26.88 / 30.67                                                                |
| <b>55-59</b>                   | 87 280 / 84 212                                                         | 85 820 / 56 346                         | 74.43 / 82.71              | 5.09 / 5.83                                                    | 7.04 / 9.60             | 20.38 / 31.45              | 31.96 / 31.37                                                                |
| <b>60-64</b>                   | 72 448 / 69 337                                                         | 71 450 / 36 255                         | 82.67 / 87.96              | 5.57 / 5.98                                                    | 7.34 / 9.87             | 25.65 / 37.38              | 38.03 / 27.84                                                                |
| <b>65-69</b>                   | 65 430 / 66 777                                                         | 62 572 / 23 964                         | 89.09 / 91.10              | 5.88 / 5.90                                                    | 7.97 / 9.69             | 31.21 / 43.95              | 43.09 / 21.37                                                                |

|                    |                 |                 |               |             |             |               |               |
|--------------------|-----------------|-----------------|---------------|-------------|-------------|---------------|---------------|
| <b>70-74</b>       | 56 526 / 61 968 | 51 161 / 12 390 | 93.79 / 94.39 | 5.86 / 5.55 | 8.01 / 9.14 | 38.05 / 52.02 | 46.98 / 13.34 |
| <b>75-79</b>       | 45 154 / 56 939 | 35 993 / 5 000  | 93.34 / 93.00 | 5.76 / 4.74 | 7.89 / 8.21 | 44.10 / 58.52 | 46.04 / 6.28  |
| <b>80-84</b>       | 44 543 / 62 354 | 28 304 / 1 941  | 95.81 / 95.85 | 5.41 / 4.21 | 7.38 / 7.21 | 51.24 / 64.90 | 40.69 / 2.38  |
| <b>85-89</b>       | 27 547 / 46 335 | 14 160 / 429    | 99.79 / 98.09 | 4.98 / 3.66 | 7.63 / 6.57 | 56.91 / 69.24 | 35.74 / 0.74  |
| <b>90 and more</b> | 13 282 / 30 034 | 2 944 / 22      | 99.90 / 98.51 | 4.59 / 3.39 | 8.20 / 6.37 | 58.92 / 68.08 | 15.89 / 0.06  |

Abbreviations: 95%CI, confidence interval.

Table 2. Frequency of the consumption of driving-impairing medicines

| Frequency of use | Number of DIM | Patients under treatment<br>% (95%CI) |                        |                        | Drivers under treatment<br>% (95%CI) |                        |                        |
|------------------|---------------|---------------------------------------|------------------------|------------------------|--------------------------------------|------------------------|------------------------|
|                  |               | Males                                 | Females                | Total                  | Males                                | Females                | Total                  |
| Acute            | 1             | 97.82<br>(97.71-97.94)                | 97.17<br>(97.05-97.3)  | 97.48<br>(97.39-97.56) | 98.09<br>(97.95-98.22)               | 97.36<br>(97.16-97.57) | 97.81<br>(97.69-97.93) |
|                  | 2             | 2.16<br>(2.04-2.28)                   | 2.80<br>(2.67-2.92)    | 2.50<br>(2.41-2.58)    | 1.89<br>(1.75-2.03)                  | 2.6<br>(2.39-2.8)      | 2.16<br>(2.04-2.28)    |
|                  | 3 or more     | 0.02<br>(0.01-0.03)                   | 0.03<br>(0.02-0.05)    | 0.03<br>(0.02-0.03)    | 0.02<br>(0.01-0.04)                  | 0.04<br>(0.01-0.06)    | 0.03<br>(0.02-0.04)    |
|                  | Mean (±SD)    | 1.02<br>1.02-1.02)                    | 1.03<br>(1.03-1.03)    | 1.03<br>(1.03-1.03)    | 1.02<br>(1.02-1.02)                  | 1.03<br>(1.03-1.03)    | 1.02<br>(1.02-1.02)    |
| Sub-acute        | 1             | 71.59<br>(71.25-71.94)                | 67.39<br>(67.08-67.69) | 69.13<br>(68.90-69.35) | 71.75<br>(71.36-72.15)               | 68.59<br>(68.12-69.06) | 70.41<br>(70.1-70.71)  |
|                  | 2             | 24.71<br>(24.38-25.04)                | 27.35<br>(27.06-27.63) | 26.26<br>(26.04-26.47) | 24.53<br>(24.15-24.9)                | 26.32<br>(25.87-26.77) | 25.29<br>(25-25.58)    |
|                  | 3 or more     | 3.69<br>(3.55-3.84)                   | 5.27<br>(5.12-5.41)    | 4.62<br>(4.51-4.72)    | 3.72<br>(3.56-3.89)                  | 5.09<br>(4.86-5.31)    | 4.3<br>(4.17-4.44)     |
|                  | Mean (±SD)    | 1.32<br>(1.32-1.32)                   | 1.38<br>(1.38-1.38)    | 1.36<br>(1.36-1.36)    | 1.32<br>(1.32-1.32)                  | 1.37<br>(1.36-1.38)    | 1.34<br>(1.34-1.34)    |
| Chronic          | 1             | 31.36<br>(31.04-31.67)                | 23.84<br>(23.65-24.05) | 26.76<br>(26.58-26.93) | 30.91<br>(30.54-31.28)               | 25.58<br>(25.12-26.03) | 29.07<br>(28.78-29.36) |
|                  | 2             | 28.34<br>(28.03-28.64)                | 26.96<br>(26.74-27.17) | 27.49<br>(27.31-27.67) | 28.33<br>(27.97-28.69)               | 28.22<br>(27.75-28.68) | 28.29<br>(28-28.58)    |
|                  | 3 or more     | 40.31<br>(39.97-40.64)                | 49.20<br>(48.95-49.44) | 45.75<br>(45.56-45.95) | 40.76<br>(40.36-41.15)               | 46.21<br>(45.69-46.72) | 42.64<br>(42.33-42.95) |
|                  | Mean (±SD)    | 2.63<br>(2.62-2.64)                   | 2.96<br>(2.95-2.97)    | 2.83<br>(2.82-2.84)    | 2.65<br>(2.64-2.66)                  | 2.86<br>(2.85-2.87)    | 2.72<br>(2.71-2.73)    |
| <b>Total</b>     | Mean (±SD)    | 2.08<br>(2.07-2.09)                   | 2.39<br>(2.38-2.40)    | 2.27<br>(2.27-2.27)    | 2.1<br>(2.09-2.11)                   | 2.15<br>(2.14-2.16)    | 2.12<br>(2.11-2.13)    |

Abbreviations: 95%CI, 95% confidence interval; DIM, Driving-impairing medicines.

Table 3. Frequency of the consumption of driving-impairing medicines by ATC group.

| ATC Groups | Patients under treatment |                    |                     | Drivers under treatment |                     |                     |
|------------|--------------------------|--------------------|---------------------|-------------------------|---------------------|---------------------|
|            | % (95%CI)                |                    |                     | % (95%CI)               |                     |                     |
|            | Males                    | Females            | Total               | Males                   | Females             | Total               |
| <b>A</b>   | 5.3 (5.26-5.34)          | 5.5 (5.46-5.54)    | 5.4 (5.37-5.43)     | 5.13 (5.08-5.17)        | 2.24 (2.21-2.28)    | 3.98 (3.95-4.02)    |
| <b>C</b>   | 0.36 (0.35-0.37)         | 0.26 (0.25-0.26)   | 0.31 (0.3-0.31)     | 0.32 (0.31-0.33)        | 0.04 (0.04-0.05)    | 0.21 (0.2-0.22)     |
| <b>D</b>   | 0.12 (0.12-0.13)         | 0.11 (0.1-0.11)    | 0.11 (0.11-0.12)    | 0.07 (0.07-0.08)        | 0.08 (0.07-0.09)    | 0.08 (0.07-0.08)    |
| <b>G</b>   | 0.6 (0.59-0.62)          | 1 (0.99-1.02)      | 0.81 (0.79-0.82)    | 0.52 (0.5-0.53)         | 0.49 (0.47-0.51)    | 0.51 (0.49-0.52)    |
| <b>J</b>   | 0.02 (0.02-0.03)         | 0.03 (0.03-0.04)   | 0.03 (0.03-0.03)    | 0.03 (0.02-0.03)        | 0.03 (0.02-0.03)    | 0.03 (0.02-0.03)    |
| <b>L</b>   | 0.51 (0.49-0.52)         | 0.07 (0.06-0.07)   | 0.28 (0.28-0.29)    | 0.37 (0.36-0.38)        | 0.05 (0.04-0.05)    | 0.24 (0.23-0.25)    |
| <b>M</b>   | 0.7 (0.69-0.72)          | 1.11 (1.09-1.13)   | 0.91 (0.9-0.92)     | 0.78 (0.76-0.8)         | 1.02 (0.99-1.04)    | 0.87 (0.86-0.89)    |
| <b>N</b>   | 22.45 (22.37-22.52)      | 35.68 (35.6-35.77) | 29.17 (29.12-29.23) | 21.51 (21.42-21.6)      | 21.02 (20.91-21.12) | 21.31 (21.25-21.38) |
| <b>P</b>   | 0.08 (0.07-0.08)         | 0.24 (0.23-0.25)   | 0.16 (0.15-0.16)    | 0.08 (0.07-0.09)        | 0.19 (0.18-0.2)     | 0.12 (0.12-0.13)    |
| <b>R</b>   | 3.62 (3.59-3.65)         | 4.38 (4.34-4.41)   | 4 (3.98-4.03)       | 2.51 (2.48-2.54)        | 1.98 (1.94-2.02)    | 2.3 (2.27-2.32)     |
| <b>S</b>   | 0.41 (0.4-0.42)          | 0.42 (0.41-0.43)   | 0.41 (0.41-0.42)    | 0.33 (0.32-0.35)        | 0.1 (0.09-0.1)      | 0.24 (0.23-0.25)    |
| <b>V</b>   | 0 (0-0)                  | 0 (0-0)            | 0 (0-0)             | 0 (0-0)                 | 0 (0-0)             | 0 (0-0)             |

1  
2  
3 Abbreviations: ATC, Anatomical Therapeutic Chemical Classification System; A, Alimentary tract and metabolism; B, Blood and  
4 blood forming organs; C, Cardiovascular system; D, Dermatologicals; G, Genito-urinary system and sex hormones; H, Systemic  
5 hormonal preparations, excluding sex hormones and insulins; J, Antiinfectives for systemic use; L, Antineoplastic and  
6 immunomodulating agents; M, Musculo-skeletal system; N, Nervous system; P, Antiparasitic products, insecticides and repellents; R,  
7 Respiratory system; S, Sensory organs; V, Various.  
8  
9  
10  
11  
12  
13  
14  
15  
16  
17  
18  
19  
20  
21  
22  
23  
24  
25  
26  
27  
28  
29  
30  
31  
32  
33  
34  
35  
36  
37  
38  
39  
40  
41  
42  
43  
44  
45  
46  
47  
48  
49



Table 4. Frequency of the consumption of driving-impairing medicines A, N and R ATC group.

| ATC Group | Frequency of use | Patients under treatment |                        |                        | Drivers under treatment |                        |                        |
|-----------|------------------|--------------------------|------------------------|------------------------|-------------------------|------------------------|------------------------|
|           |                  | % (95%CI)                |                        |                        | % (95%CI)               |                        |                        |
|           |                  | Males                    | Females                | Total                  | Females                 | Males                  | Total                  |
| A         | Acute            | 0.68<br>(0.61-0.74)      | 1.53<br>(1.44-1.62)    | 1.12<br>(1.06-1.18)    | 0.57<br>(0.5-0.64)      | 2.22<br>(1.96-2.47)    | 0.94<br>(0.86-1.02)    |
|           | Sub-acute        | 17.7<br>(17.4 - 18)      | 29.63<br>(29.28-29.98) | 23.87<br>(23.64-24.11) | 17.69<br>(17.34-18.04)  | 53.18<br>(52.32-54.03) | 25.62<br>(25.27-25.97) |
|           | Chronic          | 81.62<br>(81.32-81.93)   | 68.84<br>(68.49-69.19) | 75.01<br>(74.77-75.24) | 81.74<br>(81.38-82.09)  | 44.6<br>(43.75-45.46)  | 73.44<br>(73.09-73.8)  |
| N         | Acute            | 18.06<br>(17.92-18.21)   | 12.79<br>(12.69-12.89) | 14.79<br>(14.7-14.87)  | 18.02<br>(17.85-18.2)   | 16.55<br>(16.34-16.75) | 17.45<br>(17.31-17.58) |
|           | Sub-acute        | 21.6<br>(21.44-21.76)    | 18.8<br>(18.68-18.91)  | 19.86<br>(19.76-19.95) | 23.53<br>(23.34-23.72)  | 25.72<br>(25.48-25.97) | 24.39<br>(24.24-24.54) |
|           | Chronic          | 60.33<br>(60.15-60.52)   | 68.41<br>(68.27-68.55) | 65.36<br>(65.24-65.47) | 58.45<br>(58.23-58.67)  | 57.73<br>(57.45-58.01) | 58.17<br>(57.99-58.34) |
| R         | Acute            | 71.93<br>(71.5-72.36)    | 74.38<br>(74.01-74.76) | 73.29<br>(73.01-73.58) | 70.21<br>(69.61-70.81)  | 78.92<br>(78.17-79.66) | 73.18<br>(72.71-73.65) |
|           | Sub-acute        | 22.63<br>(22.24-23.03)   | 21.93<br>(21.57-22.28) | 22.24<br>(21.98-22.5)  | 23.86<br>(23.3-24.42)   | 18.49<br>(17.78-19.2)  | 22.03<br>(21.58-22.47) |
|           | Chronic          | 5.43<br>(5.22-5.65)      | 3.69<br>(3.53-3.85)    | 4.46<br>(4.33-4.6)     | 5.93<br>(5.62-6.24)     | 2.59<br>(2.3-2.88)     | 4.79<br>(4.56-5.02)    |

Abbreviations: ATC, Anatomical Therapeutic Chemical Classification System; A, Alimentary tract and metabolism; N, Nervous system; R, Respiratory system

1  
2  
3  
4  
5  
6  
7  
8  
9  
10  
11  
12  
13  
14  
15  
16  
17  
18  
19  
20  
21  
22  
23  
24  
25  
26  
27  
28  
29  
30  
31  
32  
33  
34  
35  
36  
37  
38  
39  
40  
41  
42  
43  
44  
45  
46  
47  
48  
49  
50  
51  
52  
53  
54  
55  
56  
57  
58  
59  
60

Figure 1. Frequency of medicine consumption in Castile and León in 2015.

For peer review only

1  
2  
3  
4  
5  
6  
7  
8  
9  
10  
11  
12  
13  
14  
15  
16  
17  
18  
19  
20  
21  
22  
23  
24  
25  
26  
27  
28  
29  
30  
31  
32  
33  
34  
35  
36  
37  
38  
39  
40  
41  
42  
43  
44  
45  
46  
47  
48  
49  
50  
51  
52  
53  
54  
55  
56  
57  
58  
59  
60

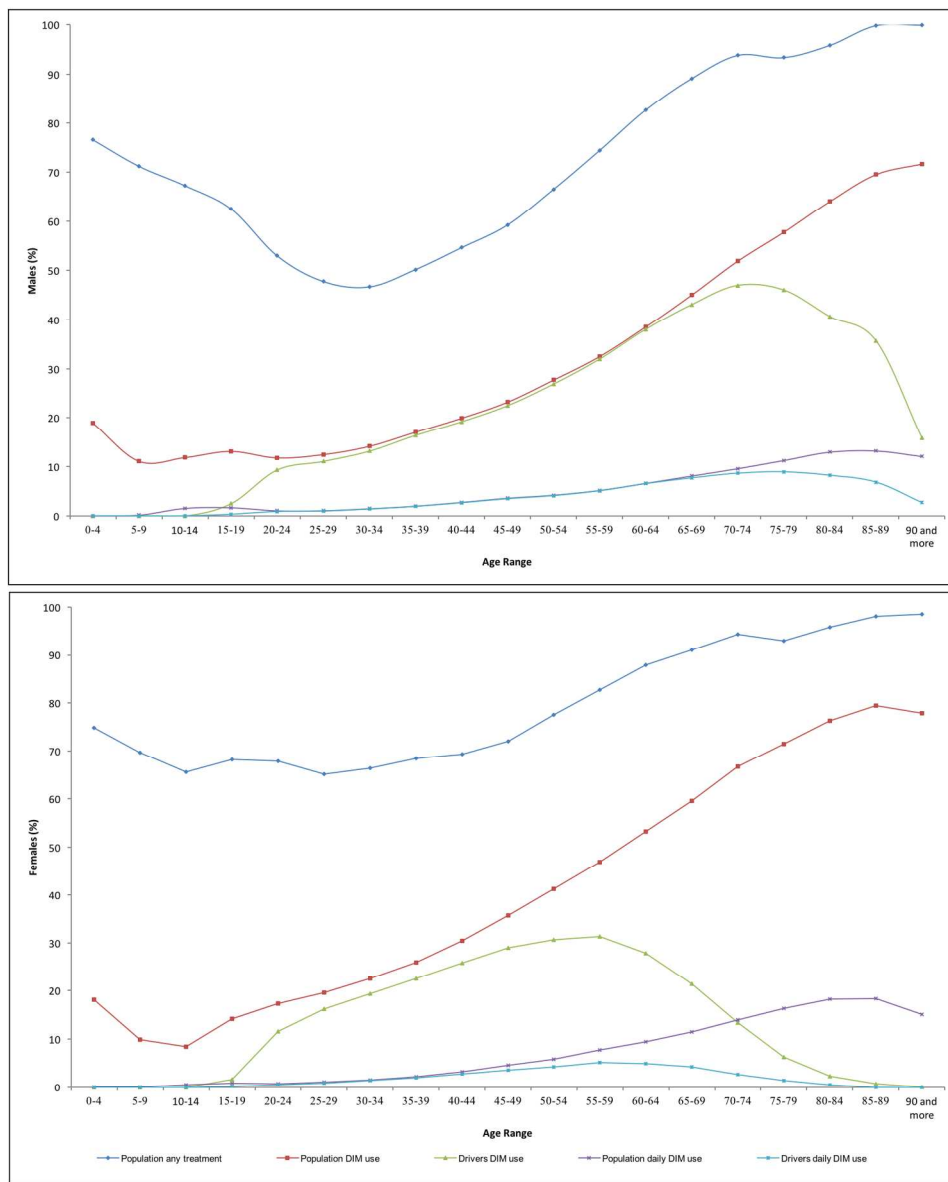

Figure 1. Frequency of medicine consumption in Castile and León in 2015.

152x187mm (300 x 300 DPI)

STROBE Statement—Checklist of items that should be included in reports of *cross-sectional studies*

|                              | Item No | Recommendation                                                                                                                                                                                                                                                                                                                                                                                                |
|------------------------------|---------|---------------------------------------------------------------------------------------------------------------------------------------------------------------------------------------------------------------------------------------------------------------------------------------------------------------------------------------------------------------------------------------------------------------|
| <b>Title and abstract</b>    | 1       | (a) Indicate the study's design with a commonly used term in the title or the abstract<br>Page 1<br>(b) Provide in the abstract an informative and balanced summary of what was done and what was found<br>Pages 2-3                                                                                                                                                                                          |
| <b>Introduction</b>          |         |                                                                                                                                                                                                                                                                                                                                                                                                               |
| Background/rationale         | 2       | Explain the scientific background and rationale for the investigation being reported<br>Pages 5-7                                                                                                                                                                                                                                                                                                             |
| Objectives                   | 3       | State specific objectives, including any prespecified hypotheses<br>Page 7                                                                                                                                                                                                                                                                                                                                    |
| <b>Methods</b>               |         |                                                                                                                                                                                                                                                                                                                                                                                                               |
| Study design                 | 4       | Present key elements of study design early in the paper<br>Pages 7-8                                                                                                                                                                                                                                                                                                                                          |
| Setting                      | 5       | Describe the setting, locations, and relevant dates, including periods of recruitment, exposure, follow-up, and data collection<br>Pages 7-8                                                                                                                                                                                                                                                                  |
| Participants                 | 6       | (a) Give the eligibility criteria, and the sources and methods of selection of participants<br>Page 7-8                                                                                                                                                                                                                                                                                                       |
| Variables                    | 7       | Clearly define all outcomes, exposures, predictors, potential confounders, and effect modifiers. Give diagnostic criteria, if applicable<br>Pages 9                                                                                                                                                                                                                                                           |
| Data sources/<br>measurement | 8*      | For each variable of interest, give sources of data and details of methods of assessment (measurement). Describe comparability of assessment methods if there is more than one group<br>Page 9                                                                                                                                                                                                                |
| Bias                         | 9       | Describe any efforts to address potential sources of bias<br>Page 9                                                                                                                                                                                                                                                                                                                                           |
| Study size                   | 10      | Explain how the study size was arrived at<br>Pages 7-8                                                                                                                                                                                                                                                                                                                                                        |
| Quantitative variables       | 11      | Explain how quantitative variables were handled in the analyses. If applicable, describe which groupings were chosen and why<br>Pages 9                                                                                                                                                                                                                                                                       |
| Statistical methods          | 12      | (a) Describe all statistical methods, including those used to control for confounding<br>Page 10<br>(b) Describe any methods used to examine subgroups and interactions<br>Page 8 and 10<br>(c) Explain how missing data were addressed<br>Page 8<br>(d) If applicable, describe analytical methods taking account of sampling strategy<br>Page 10<br>(e) Describe any sensitivity analyses<br>Non applicable |
| <b>Results</b>               |         |                                                                                                                                                                                                                                                                                                                                                                                                               |
| Participants                 | 13*     | (a) Report numbers of individuals at each stage of study—eg numbers potentially                                                                                                                                                                                                                                                                                                                               |

|                          |     |                                                                                                                                                                                                                                                                                                                                                                                                                                                               |
|--------------------------|-----|---------------------------------------------------------------------------------------------------------------------------------------------------------------------------------------------------------------------------------------------------------------------------------------------------------------------------------------------------------------------------------------------------------------------------------------------------------------|
|                          |     | eligible, examined for eligibility, confirmed eligible, included in the study, completing follow-up, and analysed<br>Page 10                                                                                                                                                                                                                                                                                                                                  |
|                          |     | (b) Give reasons for non-participation at each stage<br>Non applicable                                                                                                                                                                                                                                                                                                                                                                                        |
|                          |     | (c) Consider use of a flow diagram<br>Non applicable                                                                                                                                                                                                                                                                                                                                                                                                          |
| Descriptive data         | 14* | (a) Give characteristics of study participants (eg demographic, clinical, social) and information on exposures and potential confounders<br>Page 10<br>(b) Indicate number of participants with missing data for each variable of interest<br>Pages 10-11                                                                                                                                                                                                     |
| Outcome data             | 15* | Report numbers of outcome events or summary measures<br>Pages 10-11                                                                                                                                                                                                                                                                                                                                                                                           |
| Main results             | 16  | (a) Give unadjusted estimates and, if applicable, confounder-adjusted estimates and their precision (eg, 95% confidence interval). Make clear which confounders were adjusted for and why they were included<br>Pages 11-12<br>(b) Report category boundaries when continuous variables were categorized<br>Pages 11-12<br>(c) If relevant, consider translating estimates of relative risk into absolute risk for a meaningful time period<br>Non applicable |
| Other analyses           | 17  | Report other analyses done—eg analyses of subgroups and interactions, and sensitivity analyses<br>Non applicable                                                                                                                                                                                                                                                                                                                                              |
| <b>Discussion</b>        |     |                                                                                                                                                                                                                                                                                                                                                                                                                                                               |
| Key results              | 18  | Summarise key results with reference to study objectives<br>Page 12                                                                                                                                                                                                                                                                                                                                                                                           |
| Limitations              | 19  | Discuss limitations of the study, taking into account sources of potential bias or imprecision. Discuss both direction and magnitude of any potential bias<br>Page 16                                                                                                                                                                                                                                                                                         |
| Interpretation           | 20  | Give a cautious overall interpretation of results considering objectives, limitations, multiplicity of analyses, results from similar studies, and other relevant evidence<br>Pages 12-16                                                                                                                                                                                                                                                                     |
| Generalisability         | 21  | Discuss the generalisability (external validity) of the study results<br>Pages 12-15                                                                                                                                                                                                                                                                                                                                                                          |
| <b>Other information</b> |     |                                                                                                                                                                                                                                                                                                                                                                                                                                                               |
| Funding                  | 22  | Give the source of funding and the role of the funders for the present study and, if applicable, for the original study on which the present article is based<br>Page 18                                                                                                                                                                                                                                                                                      |

\*Give information separately for exposed and unexposed groups.

**Note:** An Explanation and Elaboration article discusses each checklist item and gives methodological background and published examples of transparent reporting. The STROBE checklist is best used in conjunction with this article (freely available on the Web sites of PLoS Medicine at <http://www.plosmedicine.org/>, Annals of Internal Medicine at

1  
2  
3  
4  
5  
6  
7  
8  
9  
10  
11  
12  
13  
14  
15  
16  
17  
18  
19  
20  
21  
22  
23  
24  
25  
26  
27  
28  
29  
30  
31  
32  
33  
34  
35  
36  
37  
38  
39  
40  
41  
42  
43  
44  
45  
46  
47  
48  
49  
50  
51  
52  
53  
54  
55  
56  
57  
58  
59  
60

<http://www.annals.org/>, and *Epidemiology* at <http://www.epidem.com/>). Information on the STROBE Initiative is available at [www.strobe-statement.org](http://www.strobe-statement.org).

For peer review only
